# Supplementary material
Source: PubMed Central journal article supplement (PMC6055480)
Supplement: NIHMS957973-supplement-Supplemental_appendix.pdf [file NIHMS957973-supplement-Supplemental_appendix.pdf]

# THE LANCET

## Global Health

### Supplementary appendix

This appendix formed part of the original submission and has been peer reviewed. We post it as supplied by the authors.

Supplement to: Bearak J, Popinchalk A, Alkema L, Sedgh G. Global, regional, and subregional trends in unintended pregnancy and its outcomes from 1990 to 2014: estimates from a Bayesian hierarchical model. *Lancet Glob Health* 2018; published online March 5. [http://dx.doi.org/10.1016/S2214-109X\(18\)30029-9](http://dx.doi.org/10.1016/S2214-109X(18)30029-9).

# Global, regional, and subregional trends in unintended pregnancy and its outcomes from 1990 to 2014: estimates from a Bayesian hierarchical model – Supplementary material

Bearak J, Popinchalk A, Alkema L, Sedgh G

## Contents

|          |                                                                            |           |
|----------|----------------------------------------------------------------------------|-----------|
| <b>1</b> | <b>Technical details on the unintended pregnancy estimation model</b>      | <b>2</b>  |
| 1.1      | Notation . . . . .                                                         | 2         |
| 1.2      | Model summary . . . . .                                                    | 2         |
| 1.3      | Modeling subgroup-specific unintended birth rates . . . . .                | 3         |
| 1.4      | Modeling subgroup-specific unintended pregnancy rates . . . . .            | 4         |
| 1.4.1    | Subgroup unintended pregnancy rate constraints . . . . .                   | 5         |
| 1.4.2    | Priors . . . . .                                                           | 7         |
| 1.5      | Data . . . . .                                                             | 7         |
| 1.5.1    | Data on the proportions of births or pregnancies unintended . . . . .      | 7         |
| 1.5.2    | Data on the proportion of unintended births by marital status . . . . .    | 8         |
| 1.5.3    | Data on the proportion of unintended births by contraceptive use . . . . . | 9         |
| 1.5.4    | Data models . . . . .                                                      | 9         |
| 1.6      | Reported estimates . . . . .                                               | 10        |
| <b>2</b> | <b>Model choice and validation</b>                                         | <b>12</b> |
| 2.1      | Choice of covariates . . . . .                                             | 12        |
| 2.2      | In-sample validation exercise . . . . .                                    | 12        |
| 2.3      | Out-of-sample validation exercises . . . . .                               | 13        |
| 2.3.1    | Leave-one-country-out validations . . . . .                                | 15        |
| 2.4      | Comparison of estimates across candidate models . . . . .                  | 17        |
| <b>3</b> | <b>Table of birth and pregnancy intention data</b>                         | <b>19</b> |
| <b>4</b> | <b>Appendix Tables</b>                                                     | <b>35</b> |

## List of Figures

|   |                                                                                                                  |    |
|---|------------------------------------------------------------------------------------------------------------------|----|
| 1 | Estimated unintended pregnancy rates in models with and without covariates, for 1990-1994 and 2010-2014. . . . . | 18 |
|---|------------------------------------------------------------------------------------------------------------------|----|

## List of Tables

|   |                                                                                                                                                                                                                         |    |
|---|-------------------------------------------------------------------------------------------------------------------------------------------------------------------------------------------------------------------------|----|
| 1 | Number of countries for which data on birth or pregnancy intention are available, by model cluster and period. . . . .                                                                                                  | 9  |
| 2 | Validation results based on comparing typical-country estimates to data-driven estimates, for all countries with data, averaging within countries. . . . .                                                              | 13 |
| 3 | Validation results based on comparing typical-subregion estimates to data-driven estimates, based on country estimates for countries with data, summarized by period. . .                                               | 14 |
| 4 | Validation results comparing model-based predictions to the excluded data, when leaving out 20% of birth intention data. . . . .                                                                                        | 14 |
| 5 | Validation results comparing model-based estimates from the training set and full dataset, when leaving out 20% of birth intention data. . . . .                                                                        | 15 |
| 6 | Validation results comparing model-based predictions to excluded data, from leave-one-country-out validations of the birth intention data, from leave-one-country-out validations of the birth intention data . . . . . | 15 |
| 7 | Validation results comparing model-based estimates from the training set and full dataset, from leave-one-country-out validations of the birth intention data . . . . .                                                 | 16 |
| 8 | Data on the proportions of births and pregnancies unintended, as input into the model.                                                                                                                                  | 19 |
| 8 | Data on the proportions of births and pregnancies unintended, as input into the model.                                                                                                                                  | 20 |
| 8 | Data on the proportions of births and pregnancies unintended, as input into the model.                                                                                                                                  | 21 |
| 8 | Data on the proportions of births and pregnancies unintended, as input into the model.                                                                                                                                  | 22 |
| 8 | Data on the proportions of births and pregnancies unintended, as input into the model.                                                                                                                                  | 23 |
| 8 | Data on the proportions of births and pregnancies unintended, as input into the model.                                                                                                                                  | 24 |
| 8 | Data on the proportions of births and pregnancies unintended, as input into the model.                                                                                                                                  | 25 |
| 8 | Data on the proportions of births and pregnancies unintended, as input into the model.                                                                                                                                  | 26 |
| 8 | Data on the proportions of births and pregnancies unintended, as input into the model.                                                                                                                                  | 27 |
| 8 | Data on the proportions of births and pregnancies unintended, as input into the model.                                                                                                                                  | 28 |
| 8 | Data on the proportions of births and pregnancies unintended, as input into the model.                                                                                                                                  | 29 |
| 8 | Data on the proportions of births and pregnancies unintended, as input into the model.                                                                                                                                  | 30 |
| 8 | Data on the proportions of births and pregnancies unintended, as input into the model.                                                                                                                                  | 31 |
| 8 | Data on the proportions of births and pregnancies unintended, as input into the model.                                                                                                                                  | 32 |

## 1 Technical details on the unintended pregnancy estimation model

### 1.1 Notation

In the model description, lower-case Greek letters refer to unknown parameters, whereas upper-case Greek letters refer to variables which are functions of unknown parameters (modeled estimates). Roman letters refer to variables that are known or fixed, including data (lowercase) and estimates provided by other sources or the literature (uppercase).

Truncated normal and log-normal distributions are used in the model specification, denoted as follows: if  $a \sim \text{logN}(b, c)T(d, e)$ , then  $\log(a)$  follows a normal distribution with mean  $\log(b)$ , variance  $c$ , and  $a$  is constrained to values in between  $d$  and  $e$ .

### 1.2 Model summary

The proportion of births unintended for country  $c$  in calendar year  $t$ , denoted by  $\Theta_{c,t}$ , is the main quantity to be estimated. In each country-year, unintended births are attributed to subgroups of

women, with  $\Omega_{c,t,f}$  referring to the number of unintended births in the subgroup indexed by  $f$ , and proportion of births unintended given by

$$\Theta_{c,t} = \frac{\sum_{f \in \mathcal{F}^{all}} \Omega_{c,t,f}}{B_{c,t}},$$

where  $\mathcal{F}^{all}$  captures all (mutually exclusive) subgroups of women with non-zero unintended birth rates, and  $B_{c,t}$  is the total number of births, obtained from the 2015 World Population Prospects of the United Nations Population Division (UNPD).

The subgroups are based on dividing women aged 15–49 for each country-year,  $W_{c,t}^{(15-49)}$ , into the following groups:

$$W_{c,t}^{(15-49)} = W_{c,t,f_{unmarried}} + W_{c,t,f_{no.need}} + W_{c,t,f_{fail}} + W_{c,t,f_{no.fail}} + W_{c,t,f_{unmet}},$$

where  $W_{c,t,f}$  refers to the number of women in the subgroup indexed by  $f$  who are aged 15–49 (leaving out the superscript to simplify notation), where index  $f_{unmarried}$  refers to unmarried women, and among married women, those with no need for contraceptives are indexed by  $f_{no.need}$ , users are divided into users who experience a failure ( $f_{fail}$ ) and users who do not experience a failure ( $f_{no.fail}$ ), and married women with an unmet need for contraceptive are indexed with  $f_{unmet}$ . Note that, as per United Nations definitions and following the conventions within the literature, “married” includes (and “unmarried” excludes) all cohabiting women. Estimates of the proportions of married women with met and unmet need were obtained from the UNPD, and the proportion of married women with met need who experienced a contraceptive failure were previously estimated as inputs for the abortion incidence model (Alkema et al. 2013; Sedgh et al 2016). It was necessary to incorporate the estimated sizes of subgroups of women that were used in the estimation of abortion incidence, so that we could use the previously estimated abortion rates. Assuming that users who do not experience a failure have a zero pregnancy rate, the set of mutually exclusive subgroups with non-zero unintended birth rates is given by  $\mathcal{F}^{all} = \{f_{unmarried}, f_{no.need}, f_{fail}, f_{unmet}\}$ .

Subgroup-specific unintended births are obtained from the subgroup size and the subgroup-period specific unintended birth rate  $\omega_{c,p,f}$ :

$$\Omega_{c,t,f} = \omega_{c,p[t],f} \cdot W_{c,t,f},$$

where  $\omega_{c,p,f}$  is defined for each 5-year period  $p = 1, 2, \dots, 5$  from 1990–1994 to 2010–2014, and  $p[t]$  refers to the 5-year period that  $t$  is contained in. The next section discusses how the subgroup rates were modeled, followed by an explanation of the data models, and the construction of aggregate outcomes.

### 1.3 Modeling subgroup-specific unintended birth rates

We estimated  $\omega_{c,p,f}$  for all country-period-subgroup combinations, except for married women with no need for contraception; these women were assumed not to have unintended births. In the model, the unintended birth rate for any subgroup was a function of the modeled unintended pregnancy rate for that subgroup,  $\psi_{c,p,f}$ , and the abortion rate for that subgroup,  $a_{c,p,f}$ :

$$\omega_{c,p,f} = \begin{cases} 0 & \text{for } f = f_{no.need} \\ \frac{\psi_{c,p,f} - 1.1a_{c,p,f}}{1.2} & \text{for } f \neq f_{no.need} \end{cases}$$

This equation incorporates miscarriages (which are defined here to include all spontaneous fetal losses after five weeks of gestation, including stillbirths), using an approach derived from life tables of

pregnancy loss by gestational age, which indicate that these events are equal to about 20% of births plus 10% of induced abortions. Estimated abortion rates were obtained from Sedgh et al. 2016, and incorporated into this model as fixed inputs.

By modeling unintended pregnancy rates, which we describe in the next section, and then transforming these into unintended birth rates, this equation allows us to use the previously estimated abortion rates to inform the unintended pregnancies model.

#### 1.4 Modeling subgroup-specific unintended pregnancy rates

We modeled  $\psi_{c,p,f}$  for all country-period-subgroup combinations. In this section, we discuss how the rates were allowed to vary by subgroup as well as across countries and with time.

In the model, we assumed that pregnancies to married women with no need for contraception were intended. We also assumed that married women who experienced method failures would exhibit the highest rates of the four subgroups, because by definition every woman experiencing a contraceptive failure experienced an unintended pregnancy. User failure rates may vary across countries and over time, which is captured by allowing the subgroup rates to vary by country and five-year period.

$$\begin{aligned}\psi_{c,p,f_{no.need}} &= 0, \\ \psi_{c,p,f} &\leq \psi_{c,p,f_{fail}} \text{ for } f = f_{unmet}, f_{unmarried}.\end{aligned}$$

For the reference period  $p_0$ , which refers to 2005-2009, a hierarchical model was used to estimate the country and region-specific unintended pregnancy rates for married women with unmet need for contraception, married women who experienced a contraceptive failure, and unmarried women. For  $f = f_{unmet}, f_{fail}, f_{unmarried}$ :

$$\psi_{c,p_0,f} \sim \log\text{N}\left(\psi_{r[c],p_0,f}^{(region)}, \eta_f^2\right) T(\psi_{c,p_0,f}^{(min)}, \psi_{c,p_0,f}^{(max)}), \quad (1)$$

$$\psi_{r,p_0,f}^{(region)} \sim \log\text{N}\left(\psi_f^{(world)}, \eta_f^{2(region)}\right) T(0.0001, 5), \quad (2)$$

where the variance terms  $\eta_f^2$  and  $\eta_f^{2(region)}$  capture the between-country and between-region variability, respectively, for subgroup  $f$  and  $\psi_f^{(world)}$  refers to the global level mean unintended pregnancy rate parameter, and constraints are included such that the resulting unintended pregnancy rates for the unmet and unmarried groups are no higher than the unintended pregnancy rate for the failures group, no lower than the abortion rate, and so that the sum of unintended births does not exceed the birth rate. These constraints will be discussed in a subsequent section.

For period  $p$  before or after  $p_0$ , with neighboring period  $p^*[p] = p - 1$  for  $p > p_0$  and  $p^*[p] = p + 1$  for  $p < p_0$ , we capture the relative change between  $p^*[p]$  and  $p$  on the country and regional level, respectively, as follows:

$$\begin{aligned}\psi_{c,p,f} &\sim \log\text{N}\left(\psi_{c,p^*[p],f} \cdot \frac{\psi_{r[c],p,f}^{(region)}}{\psi_{r[c],p^*[p],f}^{(region)}}, v_f^2\right) T(\psi_{c,p,f}^{(min)}, \psi_{c,p,f}^{(max)}) \text{ for } p \neq p_0, \\ \psi_{r,p,f}^{(region)} &\sim \log\text{N}\left(\log \psi_{r[c],p^*[p],f}^{(region)}, v_f^{2(region)}\right) T(0.0001, 5) \text{ for } p \neq p_0.\end{aligned}$$

These are parameterized so that, at the regional level, the most likely subgroup rate is the subgroup rate from the neighboring period (i.e., no change), whereas at the country level, the most likely subgroup rate is equal to the product of the subgroup rate from the neighboring period and the relative regional change. The same constraints are applied as above, in the description of the equations for the reference period.

**Including covariates** The model described so far is extended to incorporate covariates that may be predictive of differences in unintended pregnancy rates across countries and/or within countries over time. In each country-period, we include a “multiplier” parameter,  $\Gamma_{c,p,f}$ . In the case of one covariate,  $\Gamma_{c,p,f} = x_{c,p} \cdot \gamma_f$ , where  $x_{c,p}$  refers to the mean of the covariate in the country-period, centered around its mean over all country-periods, such that  $x_{c,p} = 0$  refers to a country-period with an “average” covariate outcome, and  $\gamma_f$  is a subgroup-specific regression coefficient. For model fits where the effect of the covariate was assumed to be the same for a subset of subgroups  $f$ , e.g.  $f_1$  and  $f_2$ , we set  $\gamma_{f_1} = \gamma_{f_2}$ . This is easily extended to multiple covariates, indexed by  $g$ , so that the multiplier for subgroup  $f$  in country-period  $c, p$  is given by,

$$\Gamma_{c,p,f} = \sum_{g \in \mathcal{G}_f^{all}} \gamma_{f,g} \cdot x_{g,c,p},$$

where  $\mathcal{G}_f^{all}$  captures all covariates used to predict the unintended pregnancy rate for a subgroup  $f$ .

For the reference period  $p_0$ , the hierarchical model (Eq.1) was extended by including this multiplier:

$$\psi_{c,p_0,f} \sim \text{logN} \left( \psi_{r[c],p_0,f}^{(region)} \cdot \exp(\Gamma_{c,p_0,f}), \eta_f^2 \right) T \left( \psi_{c,p_0,f}^{(min)}, \psi_{c,p_0,f}^{(max)} \right). \quad (3)$$

In this extended set-up,  $\psi_{r,p_0,f}^{(region)}$  represents the regional mean parameter for a country with covariates equal to 0, hence average covariates.

For periods  $p$  before or after  $p_0$  (with  $p^*[p] = p - 1$  for  $p > p_0$  and  $p^*[p] = p + 1$  for  $p < p_0$ ), we divide the subgroup rate from the reference period,  $\psi_{c,p^*[p],f}$ , by  $\exp(\Gamma_{c,p^*[p],f})$ , since the impact of the multiplier at  $p^*[p]$  was incorporated into  $\psi_{c,p^*[p],f}$  in Eq.3, and multiply by  $\exp(\Gamma_{c,p,f})$ :

$$\psi_{c,p,f} \sim \text{logN} \left( \frac{\psi_{c,p^*[p],f}}{\exp(\Gamma_{c,p^*[p],f})} \cdot \frac{\psi_{r[c],p,f}^{(region)}}{\psi_{r[c],p^*[p],f}^{(region)}} \cdot \exp(\Gamma_{c,p,f}), v_f^2 \right) T \left( \psi_{c,p,f}^{(min)}, \psi_{c,p,f}^{(max)} \right) \text{ for } p \neq p_0.$$

The lower and upper bounds are as before, satisfying the constraints such that the highest unintended pregnancy rate is among the failures subgroup, the unintended pregnancy rates are at least as high as the abortion rates, and such that the estimated unintended pregnancy rate does not exceed the total fertility rate.

This generalizes to the no-covariate scenario, as with no covariates,  $\Gamma_{c,p,f} = 0$ .

#### 1.4.1 Subgroup unintended pregnancy rate constraints

We set minimum and maximum subgroup rates for every country-period,  $\psi_{c,p,f}^{(min)}$  and  $\psi_{c,p,f}^{(max)}$ . Since we transform a modeled unintended pregnancy rate into an estimated unintended birth rate in Eq. 1 by subtracting abortions and miscarriages, we define the minimum rates to be equal to 1.1 times the estimated abortion rates for each subgroup,  $a_{c,p,f}$ . We multiply the abortion rates by 1.1 since, as noted earlier, we include miscarriages using an approach derived from life tables of pregnancy loss by gestational age, which indicates that these events are equal to about 20% of births plus 10% of induced abortions:

$$\begin{aligned} \psi_{c,p,f_{fail}}^{(min)} &= 1.1a_{c,p,f_{fail}}, \\ \psi_{c,p,f_{unmet}}^{(min)} &= 1.1a_{c,p,f_{unmet}}, \\ \psi_{c,p,f_{unmarried}}^{(min)} &= 1.1a_{c,p,f_{unmarried}}. \end{aligned}$$

We also constrain the subgroup unintended *pregnancy* rates such that the sum of unintended *births*,  $\Omega_{c,t}$ , cannot exceed the total number of births as estimated by the UNPD, through a series of constraints to  $\psi_{c,p,f}$ . We set the  $\psi_{c,p,f}^{(max)}$  such that the modeled number of unintended births to any subgroup  $f$ , and, moreover, the sum of unintended births across all subgroups, never exceeds the total fertility for any year in a country-period  $c, p$ .

The maximum unintended pregnancy rate  $\psi_{c,p,f}^{(max)}$  for any subgroup  $f$  and period  $p$  is the sum of 1.2 times the maximum unintended birth rate,  $\omega_{c,p,f}^{(max)}$ , and 1.1 times the abortion rate,  $a_{c,p,f}$ . The maximum unintended birth rate, in turn, is defined as the ratio of two parameters,  $\Omega_{c,p,f}^{(max)}$ , the maximum possible number of unintended births, and  $W_{c,p,f}^{(max)}$ , which refers to the maximum size of the  $f$ -th subgroup in period  $p$ .

$$\begin{aligned}\psi_{c,p,f}^{(max)} &= 1.2\omega_{c,p,f}^{(max)} + 1.1a_{c,p,f} \\ \omega_{c,p,f}^{(max)} &= \frac{\Omega_{c,p,f}^{(max)}}{W_{c,t_p}^{(max)},f}\end{aligned}$$

The maximum used for the unintended birth rate is the ratio of the maximum possible number of unintended births to the maximum size of the  $f$ -th subgroup in period  $p$  because if we divided by the minimum size of the  $f$ -th subgroup in period  $p$ , then, in one of the years in the five-year period  $p$ , it would be theoretically possible to compute a number of unintended births that exceeded the total number of births. This would lead to a proportion of births unintended greater than 1. Although in practice the year-to-year variation in the sizes of the subgroups are small, and the estimated numbers of unintended births are nowhere near the total number of births that occurred in any year, these constraints are necessary in order for the model to initialize.

The maximum used for the number of unintended births summed across all subgroups is equal to the the lowest number of births in the period,  $B_{c,p}^{(min)}$ . We do not use  $B_{c,p}^{(max)}$  because, if the maximum number of unintended births summed across all subgroups were equal to the maximum number of births observed in any of the years in the period, then, it would be theoretically possible to compute a number of unintended births higher than the total number of births observed. Although in practice this is a non-informative assumption because the estimated numbers of unintended births are nowhere near the total numbers of births, this is necessary for the model to initialize. The maximum number of unintended births,  $\Omega_{c,p,f}^{(max)}$ , for the different subgroups is obtained as follows:

$$\begin{aligned}\Omega_{c,p,f_{fail}}^{(max)} &= 0.97B_{c,p}^{(min)}, \\ \Omega_{c,p,f_{unmet}}^{(max)} &= 0.98B_{c,p}^{(min)} - \omega_{c,p,f_{fail}} \cdot W_{c,t_p}^{(max)},f_{fail}, \\ \Omega_{c,p,f_{unmarried}}^{(max)} &= 0.99B_{c,p}^{(min)} - \omega_{c,p,f_{fail}} \cdot W_{c,t_p}^{(max)},f_{fail} - \omega_{c,p,f_{unmet}} \cdot W_{c,t_p}^{(max)},f_{unmet},\end{aligned}$$

This set of equations is implemented such that the total estimated number of unintended births across all subgroups cannot, in effect, exceed 99% of total fertility in any country-year. To do so, we set the maximum number of unintended births,  $\Omega_{c,p,f}^{(max)}$ , for  $f_{fail}$  to 97% of all births. For  $f_{unmet}$ , we subtract from this quantity the estimated number of unintended births to  $f_{fail}$  and, since these could theoretically equal each other, to prevent a maximum of 0 births, we add 1% of all births; we do likewise with  $f_{unmarried}$ .

Since the subgroup sizes and birth rates vary by five-year periods  $p$ , whereas the sizes of the subgroups vary by year  $t$ , we first compute the maximum size of each subgroup,  $W_{c,t_p}^{(max)},f$ , and the lowest number of births,  $B_{c,p}^{(min)}$ , per year, within each five-year period:

$$\begin{aligned}W_{c,t_p}^{(max)},f &= \max(W_{c,t_1,p},f, W_{c,t_2,p},f, W_{c,t_3,p},f, W_{c,t_4,p},f, W_{c,t_5,p},f), \\ B_{c,p}^{(min)} &= \min(B_{c,t_1,p}, B_{c,t_2,p}, B_{c,t_3,p}, B_{c,t_4,p}, B_{c,t_5,p}),\end{aligned}$$

where  $t_1, t_2, t_3, t_4$  and  $t_5$ , indicate the first, second, third, fourth and fifth years, respectively, of five-year period  $p$ .

## 1.4.2 Priors

For the global mean unintended pregnancy rate parameters, prior distributions are given by

$$\begin{aligned}\psi_{f_{fail}}^{(world)} &\sim U(0.0001, 5), \\ \psi_{f_{unmet}}^{(world)} &\sim U(0.0001, 5), \\ \psi_{f_{unmarried}}^{(world)} &\sim U(0.0001, 5).\end{aligned}$$

For the variances for differences in levels and slopes across countries, priors are given by

$$\begin{aligned}\eta_{f_{unmet}} &\sim U(0.01, v_{f_{unmet}}^{(region)}), \\ \eta_{f_{fail}} &\sim U(0.01, v_{f_{fail}}^{(region)}), \\ \eta_{f_{unmarried}} &\sim U(0.01, v_{f_{unmarried}}^{(region)}), \\ v_{f_{unmet}} &\sim U(0.01, \eta^{(region)}), \\ v_{f_{fail}} &\sim U(0.01, \eta^{(region)}), \\ v_{f_{unmarried}} &\sim U(0.01, \eta^{(region)}).\end{aligned}$$

The variances across clusters are similarly specified, with the exception that the variances in levels across clusters are assumed to not vary by subgroup. We conducted a sensitivity analysis to confirm that the estimates and uncertainty intervals are robust to this assumption.

$$\begin{aligned}\eta^{(region)} &\sim U(0.01, 3), \\ v_{f_{unmet}}^{(region)} &\sim U(0.01, 3), \\ v_{f_{fail}}^{(region)} &\sim U(0.01, 3), \\ v_{f_{unmarried}}^{(region)} &\sim U(0.01, 3),\end{aligned}$$

Finally, diffuse priors were chosen for the coefficients for the covariate effects:

$$\gamma_g \sim N(0, 10).$$

## 1.5 Data

### 1.5.1 Data on the proportions of births or pregnancies unintended

We searched for data on the proportion of births or pregnancies that were unintended for every country and major territory in the world for 1990-2014. Data were compiled for as many country-years as possible in 1990-2014, and were computed from nationally representative survey microdata as well as taken from published or unpublished studies identified through literature searches (See Research in Context).

**Survey data:** In Demographic and Health Surveys (DHS), conducted periodically in developing countries, a birth is considered unintended if it occurred sooner than desired or if it was not wanted at all. In cases where a woman did not respond or reported that she was unsure, the data were treated as missing at random. Women reported on births in the past three or five years, and we computed



the percent of births unintended separately for each calendar year preceding the survey. The percent of births reported as unintended tended to decrease with each successive year preceding the survey, indicating that women may reclassify unintended births as intended births with the passage of time. A supplementary analysis (not shown) revealed that averages of all births in the five years preceding the date of a woman’s interview results in data that are 12% lower, on average, than averages of all births in the year immediately preceding the interview. Therefore, in contrast to prior analyses of unintended pregnancy, we used women’s reports for the year preceding the interview. In total, data were constructed from 219 of these surveys representing 72 countries. Twenty two surveys (10%) in five countries (7%) interviewed only women who had married at least once (regardless of their present marital status), and we classified these as non-representative surveys in the model.

For another fifty DHS and Reproductive Health Surveys (RHS) representing twenty-eight countries (including sixteen countries with no other data sources), the data files were not publicly available and estimates were taken from published reports. The reports presented the intention status of births in the past three or five years combined. For eleven surveys (39%) in six countries (21%), these estimates included pregnancies. Nine surveys (18%) in seven countries (25%) excluded women not in union, which we treated as non-representative in the model.

For the United States, three estimates of the proportion of births that were unintended in the previous five years were calculated from the National Survey for Family Growth (NSFG).

**Other studies:** Another twenty-nine observations for 17 countries were obtained from published studies. Seventeen observations (59%) from eleven countries (65%) were treated as non-representative in the model, because they came from subnational studies, or studies which focused on a specific subpopulation.

Six of these observations in five countries used the London Measure of Unplanned Pregnancy (LMUP) which used a 12-item scoring system to categorize pregnancies according to whether the woman said she planned the pregnancy, did not plan it, or was ambivalent about it. Because the LMUP distinguished births that were actively planned, whereas the other data sources treat births as intended if they were wanted (whether or not they were actively planned by the respondent prior to the conception), we computed the minimum and maximum percent of births that were unintended, excluding and including the percent for which the woman was ambivalent about the pregnancy according to the LMUP, respectively.

Some of these studies asked women attending antenatal clinics about the planning status of their current pregnancies. It can be expected that women who have abortions are underrepresented in these surveys, especially if the eligibility is limited to women who are in the second or third trimester of pregnancy. Findings from two surveys were treated as estimates the planning status of births instead of pregnancies, because the gestational age of all respondents’ pregnancies was at least 5 months.

In total, we collected data on the proportion of births or pregnancies unintended from 298 surveys for 105 countries. Of these, 31 surveys were for 18 countries in Europe, 69 surveys for 25 countries in Asia, 60 for 15 countries in Latin America and the Caribbean, three surveys for one country in North America, six surveys for four countries in Oceania, and 129 for 42 countries in Africa. Of the 105 countries and territories for which data were available, 76 had data for two or more years. The number of countries and territories with at least one estimate of birth or pregnancy intention, by geographic area and time period, are in Table 1. The input data are enumerated in Table 8.

### 1.5.2 Data on the proportion of unintended births by marital status

For 195 DHS surveys representing 69 countries we calculated the proportion of unintended births to married and unmarried women. As the survey only asks the age at first marriage and it is not possible to confirm that a woman was married at the time of conception, we calculated both a maximum and minimum estimate for each survey based on the date of first marriage, the date of birth, and the respondent’s marital status at the time of interview. For the maximum estimate, births are treated as following from marital pregnancies if they occurred after the date of first marriage plus 9 months, and for the minimum estimate, births are treated as following from non-marital pregnancies if the

|                                | Countries | 1990-1994 | 1995-1999 | 2000-2004 | 2005-2009 | 2010-2014 | 1990-2014 |
|--------------------------------|-----------|-----------|-----------|-----------|-----------|-----------|-----------|
| West and Middle Africa         | 25        | 8         | 13        | 10        | 13        | 18        | 22        |
| East and Southern Africa       | 23        | 9         | 10        | 13        | 11        | 13        | 17        |
| E. Mediterranean and N. Africa | 20        | 6         | 4         | 4         | 3         | 3         | 6         |
| South and Central Asia         | 14        | 3         | 7         | 5         | 7         | 6         | 12        |
| East and Southeast Asia        | 23        | 2         | 4         | 6         | 7         | 5         | 10        |
| Latin American Region          | 35        | 12        | 14        | 13        | 13        | 5         | 15        |
| Former Soviet Bloc             | 23        | 4         | 7         | 5         | 8         | 4         | 10        |
| Europe                         | 17        | 3         | 4         | 2         | 7         | 8         | 11        |
| US/Canada/Australia/NZ         | 4         | 0         | 1         | 2         | 2         | 2         | 2         |

**Table 1: Number of countries for which data on intention status is available, by subregion and period.**

respondent is either separated or remarried. To ensure that these values captured a pregnancy that occurred within a marriage, we lagged the births by nine months in the calculations. We also obtained the proportion of unintended births to married women for one data point for the United States.

### 1.5.3 Data on the proportion of unintended births by contraceptive use

From a survey in Japan, we obtained the percent of unintended births to women who used contraception, as well as the percent to women who had an unmet need. We also obtained data on the unintended births to women who used contraception from a survey in Iran. These data were classified as non-representative because they came from samples which excluded women not in union.

### 1.5.4 Data models

All data on observed proportions were combined across types (i.e. unintended pregnancies or births), across countries and indexed by  $i = 1, 2, \dots, I$ ; for proportion  $y_i$ ,  $c[i]$  refers to the country of the observation,  $t_1[i], \dots, t_I[i]$  refer to the calendar years of the observation period and  $\mathcal{F}[i]$  denotes the subgroup that the observation refers to (which may be all women  $\mathcal{F}[i] = \mathcal{F}^{all}$ , or married women only  $\mathcal{F}[i] = \{f_{unmet}, f_{fail}\}$ ).

For proportion data, we assume that the mode of the sampling model for the data is given by the true (modeled) proportion as follows:

$$y_i \sim N(\Xi_i, \sigma_i^2)T(0, 1), \quad (4)$$

where mean  $\Xi_i$  is the true (modeled) proportion for the corresponding type-country-year-group combination, given by

$$\begin{aligned} \Xi_i &= \frac{\sum_{t=t_1[i]}^{t_I[i]} \sum_{fin\mathcal{F}[i]} \Omega_{c,t,f}}{\sum_{t=t_1[i]}^{t_I[i]} B_{c,t}}, \text{ for data on proportions of unintended births,} \\ &= \frac{\sum_{t=t_1[i]}^{t_I[i]} \sum_{fin\mathcal{F}[i]} \Psi_{c,t,f}}{\sum_{t=t_1[i]}^{t_I[i]} (1.2B_{c,t} + 1.1\Phi_{c,t})}, \text{ for data on unintended pregnancies.} \end{aligned}$$

Variance  $\sigma_i^2$  is the sum of fixed and unknown variances which are defined as follows:

$$\sigma_i^2 = s_i^2 + (\lambda_{\mathcal{F}[i]}^{(non-sampling)} + r[i] \cdot \lambda^{(non-representative)})y_i(1 - y_i), \quad (5)$$

where  $s_i^2$  is the sampling error for the observed proportion,  $\lambda^{(non-sampling)}$  is an unknown multiplied by the Bernoulli variance,  $y_i(1 - y_i)$ , to account for non-sampling error; and  $r[i] = 1$  if the proportion was computed from a non-representative survey and 0 if the survey was representative, such that  $\lambda^{(non-representative)}$  allows for additional uncertainty when incorporating proportions computed from non-representative surveys. Sampling error  $s_i^2$  is calculated to take into account sample size and survey

design for those surveys where microdata were available. For other surveys, it is given by the product of the binomial variance and an inflation factor, computed as the ratio of the design-adjusted variance and the binomial variance from surveys where microdata were available.

For observed proportions that are to be treated as ranges, indexed by  $i = I + 1, \dots, I + N$ , notation is the same as described above and subscripts (min) and (max) denote the lower and upper bounds. These data were used to constrain the true (modeled) proportions that they refer to as follows:

$$y_i^{*(min)} \leq \Xi_i \leq y_i^{*(max)}, \quad (6)$$

where  $y_i^{*(min)}$  and  $y_i^{*(max)}$  account for uncertainty in the ranges:

$$\begin{aligned} y_i^{*(min)} &\sim N(y_i^{(min)}, \sigma_i^{2(min)})T(0, 1), \\ y_i^{*(max)} &\sim N(y_i^{(max)}, \sigma_i^{2(max)})T(y_i^{*(min)}, 1), \end{aligned}$$

where  $\sigma_i^{2(min)}$  and  $\sigma_i^{2(max)}$  are given by Eq. 5, replacing  $y_i$  by  $y_i^{(min)}$  and  $y_i^{(max)}$ .

Finally, the variance multipliers were given diffuse priors, with the non-sampling variance multipliers constrained such that there is one multiplier for data on the proportion of births or pregnancies unintended (i.e., where  $f = \mathcal{F}^{all}$ ), and another for data on the percent distribution by subgroup.

$$\begin{aligned} \sqrt{\lambda_{\mathcal{F}^{all}}^{(non-sampling)}} &\sim U(0, 10), \\ \sqrt{\lambda_{f_{fail}}^{(non-sampling)}} &\sim U(0, 10), \\ \sqrt{\lambda_f^{(non-sampling)}} &= \sqrt{\lambda_{f_{fail}}^{(non-sampling)}} \text{ for } f = f_{unmet}, f_{unmarried}, \\ \sqrt{\lambda^{(non-representative)}} &\sim U(0, 10). \end{aligned}$$

## 1.6 Reported estimates

Of 224 countries and territories, 25 are excluded because we do not have the number of women of reproductive age,<sup>1</sup> and 15 because we do not have data on the percent distribution of the population.<sup>2</sup> We estimate the incidence of unintended pregnancy and the proportion of these that end in abortion for the remaining 184 countries and territories, for every five-year period between 1990 and 2014.

The unintended pregnancy model is a Bayesian model whereby interest lies in the posterior distributions of the outcomes of interest, which summarizes all available information about the outcome of interest. We used a Markov Chain Monte Carlo (MCMC) algorithm to generate samples of the posterior distributions of all model parameters. The MCMC sampling algorithm was implemented using JAGS 4.2.0 open source software and the analysis was carried out in R 3.3.3. The sampling algorithm produced a set of trajectories of unintended pregnancy, unintended birth, and proportion of unintended pregnancies that end in abortion for each country, from which regional and subregional estimates were derived.

We computed point estimates by summing the posterior medians of the estimates for each country-year within the region-period. (We report posterior medians instead of means because the posterior distributions are right-skewed.) We computed 90% uncertainty intervals (UIs) using the 5th and 95th percentiles of the posterior distributions. The interpretation of such intervals is that there is a 5% chance that the true outcome is below the interval, and there is a 5% chance that the true outcome is above the interval.

<sup>1</sup>Countries and territories with missing data on numbers of women of reproductive age: American Samoa, Anguilla, Bermuda, British Virgin Islands, Cayman Islands, Cook Islands, Dominica, Faeroe Islands, Falkland Islands, Gibraltar, Greenland, Liechtenstein, Marshall Islands, Montserrat, Nauru, Netherlands Antilles, Northern Mariana Islands, Palau, Saint Kitts and Nevis, Saint-Pierre-et-Miquelon, San Marino, Tokelau, Turks and Caicos Islands, Tuvalu, and Wallis and Futuna Islands.

<sup>2</sup>Countries and territories with missing data on distribution of population across subgroups: Aruba, Brunei Darussalam, Channel Islands, Macao Special Administrative Region, Curacao, Cyprus, French Guiana, French Polynesia, Iceland, Luxembourg, Mayotte, Micronesia, New Caledonia, Seychelles, and Western Sahara.

Aggregate outcomes (for the world and world regions) are based on the total number of unintended births,  $\Omega_{\mathcal{R},p}^{(region)}$ , and abortions,  $\Phi_{\mathcal{R},p}^{(region)}$ , for a 5-year period  $p$  for a region  $\mathcal{R}$  which contains countries  $c \in \mathcal{R}$ , defined as:

$$\Phi_{\mathcal{R},p}^{(region)} = \sum_{c \in \mathcal{R}} \sum_{t^*=t_1[p]}^{t_5[p]} \Phi_{c,t^*}, \quad (7)$$

$$\Omega_{\mathcal{R},p}^{(region)} = \sum_{c \in \mathcal{R}} \sum_{t^*=t_1[p]}^{t_5[p]} \Omega_{c,t^*}, \quad (8)$$

where  $t_1[p]$  and  $t_5[p]$  refer to the start and end year of period  $p$ , respectively. Point estimates are obtained from Eq.7 after substituting  $\Phi_{c,t} = \widehat{\Phi}_{c,t}$ , where  $\widehat{\Phi}_{c,t}$  refers to the posterior median estimate of the number of abortions in the respective country-year, and from Eq. 8, after substituting  $\Omega_{c,t} = \widehat{\Omega}_{c,t}$ , where  $\widehat{\Omega}_{c,t}$  refers to the posterior median estimate of the number of unintended births in the respective country-year, such that the aggregate estimates for the number of events in the different world regions add up to the total number of events globally for the respective period. This produces conservative estimates relative to the posterior median.

The point estimates for the number of unintended pregnancies,  $\Psi_{\mathcal{R},p}^{(region)}$ , and the proportion of unintended pregnancies that end in abortion,  $\Upsilon_{\mathcal{R},p}^{(region)}$ , are functions of these which account for miscarriages using the formula described earlier:

$$\Psi_{\mathcal{R},p}^{(region)} = 1.1 \cdot \Phi_{\mathcal{R},p}^{(region)} + 1.2 \cdot \Omega_{\mathcal{R},p}^{(region)}, \quad (9)$$

$$\Upsilon_{\mathcal{R},p}^{(region)} = \frac{\Phi_{\mathcal{R},p}^{(region)}}{\Psi_{\mathcal{R},p}^{(region)}}. \quad (10)$$

For the calculation of uncertainty intervals, posterior samples are used: for each sample  $j = 1, 2, \dots, J$

$$\Phi_{\mathcal{R},p}^{(region,j)} = \sum_{c \in \mathcal{R}} \sum_{t^*=t_1[p]}^{t_5[p]} \Phi_{c,t^*}^{(j)}, \quad (11)$$

$$\Omega_{\mathcal{R},p}^{(region,j)} = \sum_{c \in \mathcal{R}} \sum_{t^*=t_1[p]}^{t_5[p]} \Omega_{c,t^*}^{(j)}, \quad (12)$$

$$\Psi_{\mathcal{R},p}^{(region,j)} = 1.2 \cdot \Omega_{\mathcal{R},p}^{(region,j)} + 1.1 \cdot \Phi_{\mathcal{R},p}^{(region,j)}, \quad (13)$$

$$\Upsilon_{\mathcal{R},p}^{(region,j)} = \frac{\Phi_{\mathcal{R},p}^{(region,j)}}{\Psi_{\mathcal{R},p}^{(region,j)}}. \quad (14)$$

and the lower and upper bound for  $\Phi_{\mathcal{R},p}^{(region)}$  are given by the highest posterior density intervals of the resulting samples.

Although the subgroups of women were based on estimates for women 15-49, we present rates for women 15-44 to maintain consistency with past estimates of unintended pregnancy and abortion. Rates are reported for 5-year periods and among women aged 15-44, defined as follows:

$$\psi_{\mathcal{R},p}^{(region,15-44)} = \frac{\Psi_{\mathcal{R},p}^{(region)}}{\sum_{c \in \mathcal{R}} \sum_{t^*=t_1[p]}^{t_5[p]} W_{c,t}^{(15-44)}},$$

$$\omega_{\mathcal{R},p}^{(region,15-44)} = \frac{\Omega_{\mathcal{R},p}^{(region)}}{\sum_{c \in \mathcal{R}} \sum_{t^*=t_1[p]}^{t_5[p]} W_{c,t}^{(15-44)}}.$$

where  $\Psi_{\mathcal{R},p}^{(region)}$  and  $\Omega_{\mathcal{R},p}^{(region)}$  are replaced by point estimates and corresponding bounds to obtain point estimates for rates and corresponding bounds, respectively.

## 2 Model choice and validation

### 2.1 Choice of covariates

We performed a number of exploratory exercises to compare models with different combinations of predictors. We used the age structure of the population (the percent of women who were 20-24 years old) as an indicator of their fecundity and coital frequency. Female education (the percent of women aged 15 and over who had completed secondary school) was used as a proxy for the strength of women’s motivation to avoid having a child, and their unreported use of fertility control measures such as the rhythm method. Gross domestic product (GDP) per capita was used as an indicator of women’s motivation and ability to act on their fertility preferences. We evaluated whether the inclusion of a covariate reduced the unexplained variances in levels among countries and subregions,  $\eta_f$ , reduced the unexplained variances of changes within countries and subregions,  $v_f$ , or affected estimates and uncertainty intervals in plots of predicted unintended pregnancy rates (shown in Section 2.4), and we compared how well the models performed using out-of-sample and in-sample validation exercises (as described in Sections 2.2 and 2.3).

These analyses indicated that the hierarchical time series model without covariates performed well in both sets of validation exercises, and that among the candidate models that included covariates, none meaningfully improved upon the no-covariate model. Moreover, implied associations between unintended pregnancy rates and one of the main predictors used, which was GDP per capita, were in different directions depending on which subgroup rate GDP was used to predict. Lastly, as shown in Figure 1, point estimates and uncertainty intervals for major regions were similar across models. Based on these findings, we chose the no-covariate model as the basis for the model-based estimates.

The next sections provide the results of in-sample and out-of-sample validation exercises for candidate models that informed the model choice decision.

### 2.2 In-sample validation exercise

Based on the final estimates and all data, we compared (final or data-driven) estimated percentages of births unintended  $\psi_{c,t}$  to an alternative set of estimated percentages of births unintended  $\tilde{\psi}_{c,t}$ , referred to as “typical-country” percentages. The typical-country percentages of births unintended are obtained by dividing typical-country unintended birth rates by the fertility rate, where the typical-country unintended birth rates for country  $c$  are obtained from subgroup rates for a typical country (without data) within region  $r[c]$ ; the typical-subgroup rates represent the subgroup-country-period rates that would be obtained for an additional country in the same region without any data but with the same country-period-specific covariates.

We compared final and typical-country percentages, in country-years with observations, to check whether the typical-country percentages provide unbiased estimates of the final percentages (that are informed by the data) and whether the uncertainty associated with the typical-country rates is sufficiently large to include the final rates for those countries with data. The goal of these comparisons is to assess whether the typical-country rates provide unbiased estimates and an appropriate uncertainty assessment for countries without any data: we cannot carry out such checks for countries without data so we cannot do an exact assessment, but doing the checks for countries with data provides an alternative approximate validation. The validation is only approximate because all data were used to obtain the typical country estimates (but of interest nonetheless because the typical-country estimates are not driven solely by country-specific information) and because we cannot verify whether the subgroup rates of countries without data differ systematically from the subgroup rates of countries with data, within subregions. We address the former limitation in Section 2.3.

There is no difference between coverage of the uncertainty intervals with respect to unintended birth rates or percentages of births unintended, because our model does not incorporate uncertainty associated with the fertility rates, which we take from the UNPD and treat as a fixed quantity. We present relative and absolute errors with respect to the percentages of births unintended because, although the hierarchical structure of the model exchanged information on unintended pregnancy rates, the percentages of births unintended were the unknown quantities to be estimated.

We summarized differences between  $\Theta_{c,t}$  and  $\tilde{\Theta}_{c,t}$  at the country and the subregional level. To summarize findings at the country level, we first defined and calculated country-specific “errors” as the average difference between the posterior median outcomes for the two percentages,  $e_c = 100/T \sum_{t \in \mathcal{T}} (\Theta_{c,t} - \tilde{\Theta}_{c,t})$  for all years  $t \in \mathcal{T}$  for which birth intention was observed in country  $c$ , and calculated median (relative/absolute) country-specific errors. We also assessed which fraction of the final proportions of births unintended  $\Theta_{c,t}$  were outside the 90% credible intervals constructed from the typical-country proportions; we first calculated the average percentage of point estimates of the final birth intention estimates that fall above/below their respective credible intervals within a country (based on observation years), and then take the median of those percentages across countries. Validation results are presented in Table 2 for various model specifications.

|                                                                                           | # of countries | error in percentage  |     | relative error (%) |      | outside 90% UI |         |
|-------------------------------------------------------------------------------------------|----------------|----------------------|-----|--------------------|------|----------------|---------|
|                                                                                           |                | ME                   | MAE | MRE                | MARE | % Below        | % Above |
| No covariates model:                                                                      |                |                      |     |                    |      |                |         |
|                                                                                           | 104            | -0.2                 | 4.0 | -0.9               | 17.3 | 1.7            | 1.0     |
| Model in which Gross Domestic Product Affects Subgroup Rates:                             |                |                      |     |                    |      |                |         |
|                                                                                           | 104            | -0.8                 | 3.7 | -2.1               | 16.7 | 1.3            | 1.2     |
| Model in which the Proportion of Women with a Secondary Education Affects Subgroup Rates: |                |                      |     |                    |      |                |         |
|                                                                                           | 104            | -0.1                 | 3.7 | -0.8               | 16.4 | 1.2            | 1.0     |
| Model in which the Proportion of Women 20-24 Affects Subgroup Rates:                      |                |                      |     |                    |      |                |         |
|                                                                                           | 104            | -0.5                 | 4.0 | -2.7               | 15.9 | 1.7            | 1.0     |
| <i>Expected/preferred</i>                                                                 |                | <i>Close to zero</i> |     |                    |      | <i>≤ 5.0</i>   |         |

**Table 2: Validation results based on comparing typical-country estimates to data-driven estimates, for all countries with data, averaging within countries. The outcome measures are: median error (ME), absolute error (MAE), relative error (MRE) and absolute relative error (MARE) for the percentage of births unintended, as well as the % of final estimates below and above the 90% uncertainty interval (UI) based on the typical-country estimates.**

To summarize findings at the subregional level, we calculated subregional unintended pregnancy rates among those countries with birth intention data, hence among a subset of countries. Two sets of “subregional-based-on-countries-with-data” rates were constructed: the first set was based on final country-specific estimates, and the second set was based on typical-country estimates. Hence, the second set can be considered (approximately) as estimates that would have been obtained in the absence of country-specific data. Similarly to the country-level estimates, we then defined and calculated errors as the difference between the two sets of estimates and assessed the coverage of the credible intervals (i.e., the percentage of final subregional estimates that are outside the intervals constructed based on typical-country estimates). Validation results are presented in Table 3.

Comparing results across models in Tables 2 and 3, we note some differences across models but differences are generally small and in different directions. We concluded that there is no model with covariates that shows a clear improvement upon the no-covariate model. Nonetheless, we supplemented these exercises with out-of-sample validation exercises, described in the subsequent subsection.

### 2.3 Out-of-sample validation exercises

Model performance was also assessed for various models through out-of-sample validation exercises, whereby 20% of the observations were excluded at random. To quantify model performance, we calculated various validation measures based on the excluded observations. The considered measures were based on prediction errors for the percent of births unintended, where a prediction error refers to the difference between the excluded observation and the median of its posterior predictive distribution based on the training set: error  $e_i = 100 \cdot (p_i - \tilde{p}_i)$ , where  $\tilde{p}_i$  denotes the posterior median of the predictive distribution (based on the training set) for the excluded datum on the proportion of births unintended  $p_i$ . Relative errors are given by  $e_i/\tilde{p}_i$ . We also assessed the coverage of 90% prediction intervals (to quantify the calibration of the prediction intervals). Coverage is given by  $1/N \sum 1[p_i \geq l_i] \cdot 1[p_i \leq u_i]$ , where  $N$  denotes the total number of left-out observations considered and  $l_i$  and  $u_i$  the lower and upper bound of the 90% predictions interval for the  $i$ -th excluded observation.

| Period                                                                                    | error in percentage  |     | relative error (%) |      | outside 90% UI |         |
|-------------------------------------------------------------------------------------------|----------------------|-----|--------------------|------|----------------|---------|
|                                                                                           | ME                   | MAE | MRE                | MARE | % Below        | % Above |
| No covariates model:                                                                      |                      |     |                    |      |                |         |
|                                                                                           | -0.6                 | 1.5 | -1.7               | 6.0  | 0.0            | 0.0     |
| Model in which Gross Domestic Product Affects Subgroup Rates:                             |                      |     |                    |      |                |         |
|                                                                                           | -0.5                 | 1.3 | -2.1               | 5.2  | 0.0            | 0.0     |
| Model in which the Proportion of Women with a Secondary Education Affects Subgroup Rates: |                      |     |                    |      |                |         |
|                                                                                           | -0.6                 | 1.4 | -3.6               | 7.2  | 0.0            | 0.0     |
| Model in which the Proportion of Women 20-24 Affects Subgroup Rates:                      |                      |     |                    |      |                |         |
|                                                                                           | -0.3                 | 0.9 | -1.1               | 5.3  | 0.0            | 0.0     |
| <i>Expected/preferred</i>                                                                 | <i>Close to zero</i> |     |                    |      | <i>≤5.0</i>    |         |

**Table 3: Validation results based on comparing typical-subregion estimates to data-driven estimates, based on country estimates for countries with data, summarized by period. The outcome measures are: median error (ME), absolute error (MAE), relative error (MRE) and absolute relative error (MARE) for the percentage of births unintended, as well as the % of final estimates below and above the 90% uncertainty interval (UI) based on typical-subregion estimates.**

Validation results for the models average across all countries with data, and are shown in Table 4. Again, differences in model performance are small. We find that the no-covariate model performs satisfactory in this out-of-sample validation exercise. Left-out data fall outside the prediction intervals of the no-covariates model 9.1% of the time. In the models in which covariates predict the subgroup rates, there is no substantive difference.

To assess how confident one can be about the model-based estimates, we also compared the model-based estimates (based on the full data set) to the model-based estimates and uncertainty bounds based on the training set. The goal is to check that additional data does not change the current model-based estimates significantly; if more data becomes available, we expect model-based estimates produced from a larger dataset to lie well within the previously constructed uncertainty intervals. The smaller the proportion of estimates that fall outside their respective uncertainty intervals, the better (contrary to the previously described measure of calibration). Therefore, in Table 5, we compared the model-based estimates from the training set not to the observations, but, to the model-based estimates produced when all data were included in the model. In only 2.2% of cases did the final estimate fall outside the uncertainty intervals from the training set, in the no-covariates model.

|                                                                                           | # of observations | error in percentage  |     | relative error (%) |      | outside 90% PI |         |
|-------------------------------------------------------------------------------------------|-------------------|----------------------|-----|--------------------|------|----------------|---------|
|                                                                                           |                   | ME                   | MAE | MRE                | MARE | % Below        | % Above |
| No covariates model:                                                                      |                   |                      |     |                    |      |                |         |
|                                                                                           | 59                | 0.5                  | 4.1 | 1.6                | 13.4 | 6.3            | 2.8     |
| GDP affects Subgroup Rates:                                                               |                   |                      |     |                    |      |                |         |
|                                                                                           | 59                | 0.4                  | 4.1 | 1.3                | 13.4 | 6.5            | 3.1     |
| Model in which the Proportion of Women with a Secondary Education Affects Subgroup Rates: |                   |                      |     |                    |      |                |         |
|                                                                                           | 59                | 0.5                  | 4.0 | 1.5                | 13.4 | 6.4            | 2.8     |
| Model in which the Proportion of Women 20-24 Affects Subgroup Rates:                      |                   |                      |     |                    |      |                |         |
|                                                                                           | 59                | 0.5                  | 4.1 | 1.5                | 13.5 | 6.3            | 3.1     |
| <i>Expected/preferred</i>                                                                 |                   | <i>Close to zero</i> |     |                    |      | <i>≈5.0</i>    |         |

**Table 4: Validation results comparing model-based predictions to the excluded data, when leaving out 20% of birth intention data at random. The outcome measures are: median error (ME), absolute error (MAE), relative error (MRE) and absolute relative error (MARE) for the percentage of births unintended, as well as the % of left-out observations below and above the 90% prediction interval (PI) based on the training set. The results presented are averages over 40 validation runs.**

|                                                                                           | # of observations | error in percentage  |     | relative error (%) |      | outside 90% UI |         |
|-------------------------------------------------------------------------------------------|-------------------|----------------------|-----|--------------------|------|----------------|---------|
|                                                                                           |                   | ME                   | MAE | MRE                | MARE | % Below        | % Above |
| No covariates model:                                                                      |                   |                      |     |                    |      |                |         |
|                                                                                           | 59                | -0.1                 | 2.2 | -0.3               | 7.3  | 1.3            | 0.9     |
| GDP affects Subgroup Rates:                                                               |                   |                      |     |                    |      |                |         |
|                                                                                           | 59                | -0.0                 | 2.2 | -0.1               | 7.3  | 1.4            | 1.1     |
| Model in which the Proportion of Women with a Secondary Education Affects Subgroup Rates: |                   |                      |     |                    |      |                |         |
|                                                                                           | 59                | -0.1                 | 2.2 | -0.3               | 7.3  | 1.7            | 0.8     |
| Model in which the Proportion of Women 20-24 Affects Subgroup Rates:                      |                   |                      |     |                    |      |                |         |
|                                                                                           | 59                | -0.0                 | 2.2 | -0.2               | 7.2  | 1.7            | 0.8     |
| <i>Expected/preferred</i>                                                                 |                   | <i>Close to zero</i> |     |                    |      | <i>≤ 5.0</i>   |         |

**Table 5: Validation results comparing model-based estimates from the training set and full dataset, when leaving out 20% of birth intention data at random. The outcome measures are: median error (ME), absolute error (MAE), relative error (MRE) and absolute relative error (MARE) for the percentage of births unintended, as well as the % of left-out estimates below and above the 90% uncertainty interval (UI) based on the training set. The results presented are averages over 40 validation runs.**

### 2.3.1 Leave-one-country-out validations

To further quantify the performance of our final model, we also performed leave-one-country-out validations. In these exercises, we re-estimated the model once for each of the countries with survey data on the proportion of births unintended, and, in each of these runs, we excluded all birth intention data from a country. We weighted countries equally, such that countries with multiple data points were not weighted more heavily than countries with one data point. Validation results are presented in Table 6. We found that, in the no-covariates model, the excluded countries fell outside the prediction intervals from the training set 13.8% of the time, and observed no substantial differences between models.

As noted above, in order to assess our confidence in the model-based estimates, we perform validation exercises which compare the model-based estimates from the full dataset to model-based estimates from training sets. Therefore, we also compared the estimated proportions of births unintended from the left-out-country models to the estimates from the model with all the data. Results are presented in Table 7. Treating the “final” estimates as the truth reduces by 43%, from 13.8% to 7.8%, the percent of countries which fell outside the credible intervals, in the no-covariates model.

|                                                                                           | error in percentage  |      | relative error (%) |      | outside 90% PI |         |
|-------------------------------------------------------------------------------------------|----------------------|------|--------------------|------|----------------|---------|
|                                                                                           | ME                   | MAE  | MRE                | MARE | % Below        | % Above |
| No covariates model:                                                                      |                      |      |                    |      |                |         |
|                                                                                           | -0.5                 | 9.8  | 5.1                | 35.6 | 10.3           | 3.5     |
| GDP affects Subgroup Rates:                                                               |                      |      |                    |      |                |         |
|                                                                                           | 0.0                  | 10.0 | 6.7                | 36.8 | 10.2           | 5.5     |
| Model in which the Proportion of Women with a Secondary Education Affects Subgroup Rates: |                      |      |                    |      |                |         |
|                                                                                           | -0.4                 | 9.9  | 6.1                | 36.8 | 10.4           | 4.8     |
| Model in which the Proportion of Women 20-24 Affects Subgroup Rates:                      |                      |      |                    |      |                |         |
|                                                                                           | -0.2                 | 9.7  | 5.7                | 35.5 | 9.6            | 4.4     |
| <i>Expected/preferred</i>                                                                 | <i>Close to zero</i> |      |                    |      | <i>≈ 5.0</i>   |         |

**Table 6: Validation results comparing model-based predictions to excluded data, from leave-one-country-out validations of the birth intention data. The outcome measures are: median error (ME), absolute error (MAE), relative error (MRE) and absolute relative error (MARE) for the percentage of births unintended, as well as the % of left-out countries below and above the 90% prediction interval (PI) based on the training set. The results presented are averages over 98 validation runs.**



|                                                                                           | error in percentage  |     | relative error (%) |      | outside 90% UI |         |
|-------------------------------------------------------------------------------------------|----------------------|-----|--------------------|------|----------------|---------|
|                                                                                           | ME                   | MAE | MRE                | MARE | % Below        | % Above |
| No covariates model:                                                                      |                      |     |                    |      |                |         |
|                                                                                           | -0.9                 | 8.2 | 1.5                | 28.5 | 5.6            | 2.2     |
| GDP affects Subgroup Rates:                                                               |                      |     |                    |      |                |         |
|                                                                                           | -0.3                 | 8.3 | 3.2                | 29.4 | 5.1            | 3.7     |
| Model in which the Proportion of Women with a Secondary Education Affects Subgroup Rates: |                      |     |                    |      |                |         |
|                                                                                           | -0.8                 | 8.3 | 2.0                | 29.5 | 5.6            | 2.7     |
| Model in which the Proportion of Women 20-24 Affects Subgroup Rates:                      |                      |     |                    |      |                |         |
|                                                                                           | -0.5                 | 7.9 | 2.0                | 27.9 | 5.1            | 1.3     |
| <i>Expected/preferred</i>                                                                 | <i>Close to zero</i> |     |                    |      | <i>≤5.0</i>    |         |

**Table 7: Validation results comparing model-based estimates from the training set and full dataset, from leave-one-country-out validations of the birth intention data. The outcome measures are: median error (ME), absolute error (MAE), relative error (MRE) and absolute relative error (MARE) for the unintended pregnancy rate (per 1,000 women aged 15-44), as well as the % of left-out observations below and above the 90% uncertainty interval (UI) based on the training set. The results presented are averages over 98 validation runs.**

## 2.4 Comparison of estimates across candidate models

As a check on the sensitivity of our estimates to the choice of covariates, we also examined how the inclusion covariates affected the estimated unintended pregnancy rates at each time period. Estimates of the four models discussed above are given in Figure 1. The figure indicates that regional results are generally similar in models with and without covariates.

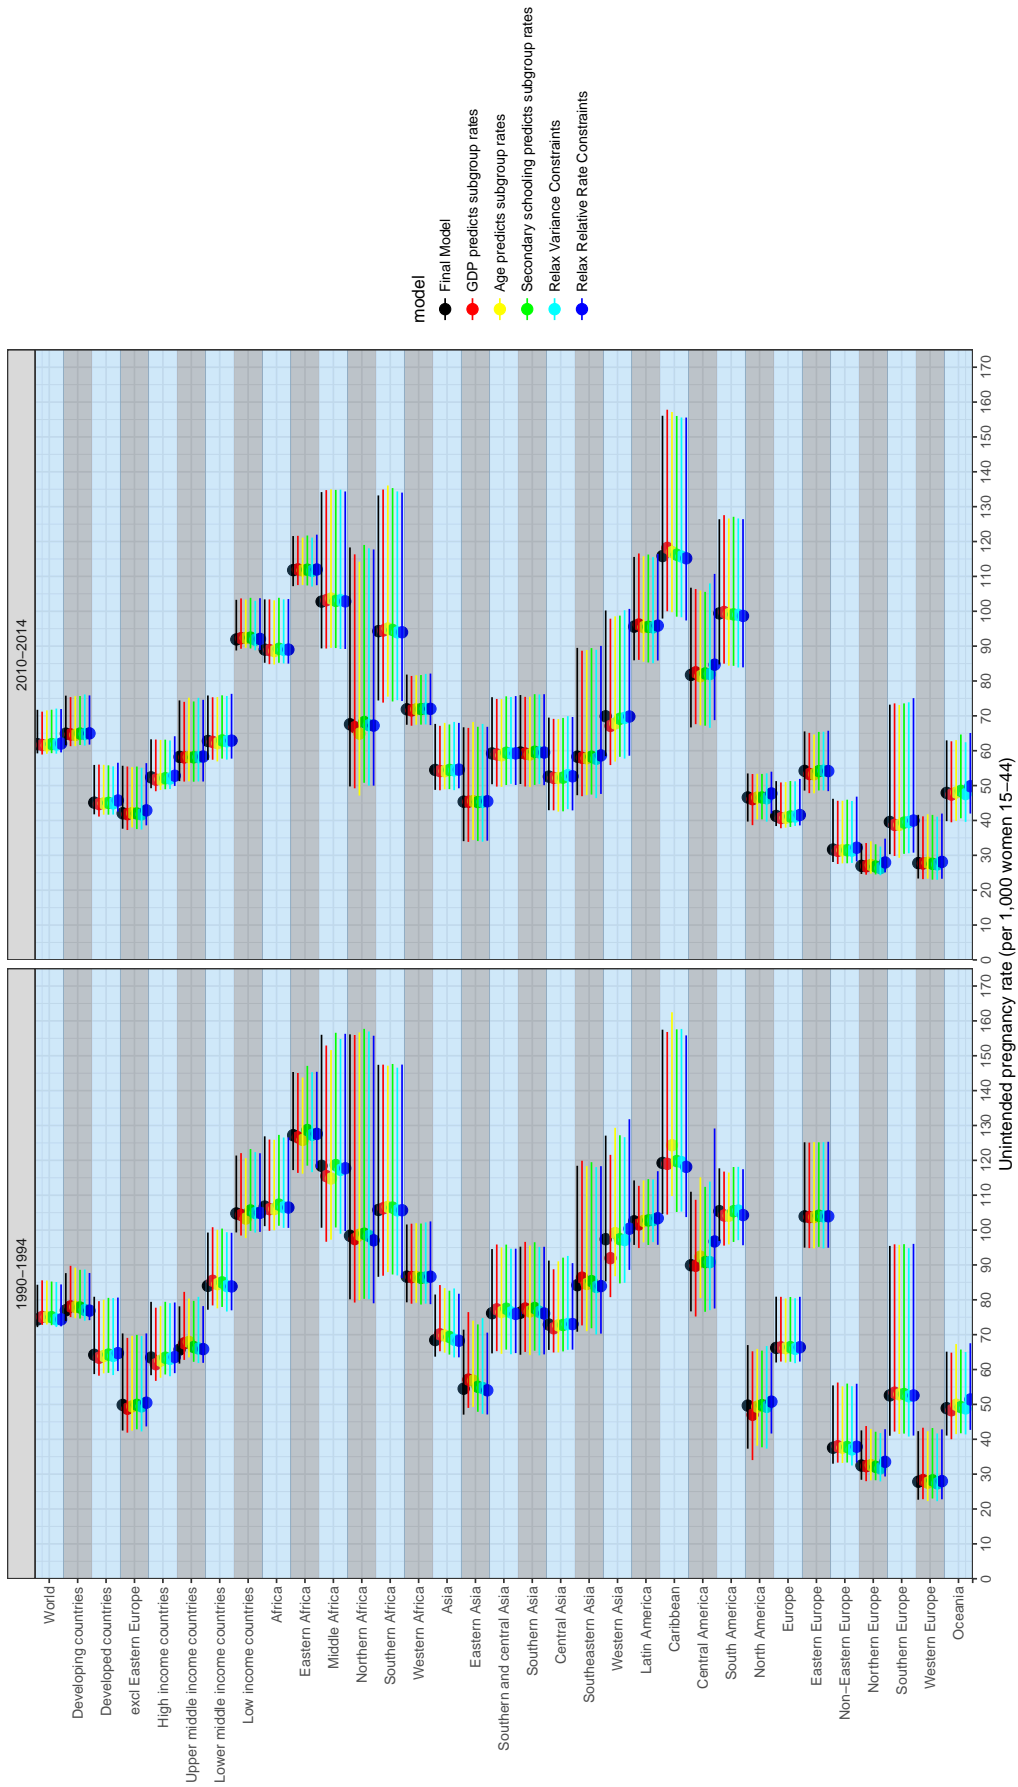

**Figure 1: Estimated unintended pregnancy rates in models with and without covariates, for 1990-1994 and 2010-2014.**

### 3 Table of birth and pregnancy intention data

**Table 8: Data on the proportions of births and pregnancies unintended, as input into the model.**

| UNPD Subregion  | Country            | Years     | Representative | Event             | Measure    | Percent   | Reference      |
|-----------------|--------------------|-----------|----------------|-------------------|------------|-----------|----------------|
| Caribbean       | Dominican Republic | 1991-1991 | yes            | births            | unintended | 44.4      | DHS micro-data |
| Caribbean       | Dominican Republic | 1996-1996 | yes            | births            | unintended | 38.8      | DHS micro-data |
| Caribbean       | Dominican Republic | 1999-1999 | yes            | births            | unintended | 50.9      | DHS micro-data |
| Caribbean       | Dominican Republic | 2002-2002 | yes            | births            | unintended | 47.5      | DHS micro-data |
| Caribbean       | Dominican Republic | 2007-2007 | yes            | births            | unintended | 48.2      | DHS micro-data |
| Caribbean       | Dominican Republic | 2013-2013 | yes            | births            | unintended | 52.5      | DHS micro-data |
| Caribbean       | Dominican Republic | 1991-1991 | yes            | unintended births | married    | 51.0-94.3 | DHS micro-data |
| Caribbean       | Dominican Republic | 1996-1996 | yes            | unintended births | married    | 52.7-89.7 | DHS micro-data |
| Caribbean       | Dominican Republic | 1999-1999 | yes            | unintended births | married    | 54.7-85.7 | DHS micro-data |
| Caribbean       | Dominican Republic | 2002-2002 | yes            | unintended births | married    | 45.8-88.9 | DHS micro-data |
| Caribbean       | Dominican Republic | 2007-2007 | yes            | unintended births | married    | 42.1-85.8 | DHS micro-data |
| Caribbean       | Dominican Republic | 2013-2013 | yes            | unintended births | married    | 40.7-78.6 | DHS micro-data |
| Caribbean       | Haiti              | 1994-1995 | yes            | births            | unintended | 56.1      | DHS micro-data |
| Caribbean       | Haiti              | 2000-2000 | yes            | births            | unintended | 61.9      | DHS micro-data |
| Caribbean       | Haiti              | 2005-2006 | yes            | births            | unintended | 54.2      | DHS micro-data |
| Caribbean       | Haiti              | 2012-2012 | yes            | births            | unintended | 49.2      | DHS micro-data |
| Caribbean       | Haiti              | 1994-1995 | yes            | unintended births | married    | 56.5-96.0 | DHS micro-data |
| Caribbean       | Haiti              | 2000-2000 | yes            | unintended births | married    | 53.9-91.0 | DHS micro-data |
| Caribbean       | Haiti              | 2005-2006 | yes            | unintended births | married    | 54.9-91.9 | DHS micro-data |
| Caribbean       | Haiti              | 2012-2012 | yes            | unintended births | married    | 56.0-82.8 | DHS micro-data |
| Caribbean       | Jamaica            | 1993-1997 | yes            | births            | unintended | 64.1      | RHS report     |
| Caribbean       | Jamaica            | 1998-2003 | yes            | births            | unintended | 60.6      | RHS report     |
| Caribbean       | Jamaica            | 2004-2009 | yes            | births            | unintended | 47.1      | RHS report     |
| Central America | Belize             | 1990-1991 | no             | births            | unintended | 33.2      | RHS report     |
| Central America | Belize             | 1995-1999 | yes            | births            | unintended | 25.8      | RHS report     |
| Central America | El Salvador        | 1990-1993 | no             | births            | unintended | 14.6      | RHS report     |
| Central America | El Salvador        | 2004-2008 | yes            | births            | unintended | 38.6      | RHS report     |
| Central America | El Salvador        | 1998-2003 | yes            | births            | unintended | 42.3      | RHS report     |
| Central America | El Salvador        | 1994-1998 | yes            | births            | unintended | 35.3      | RHS report     |
| Central America | Guatemala          | 1995-1995 | yes            | births            | unintended | 33.0      | DHS micro-data |
| Central America | Guatemala          | 1998-1999 | yes            | births            | unintended | 33.8      | DHS micro-data |
| Central America | Guatemala          | 2000-2002 | yes            | births            | unintended | 31.6      | RHS report     |
| Central America | Guatemala          | 2006-2009 | yes            | births            | unintended | 37.6      | RHS report     |
| Central America | Guatemala          | 1995-1995 | yes            | unintended births | married    | 79.8-93.6 | DHS micro-data |

Table 8: Data on the proportions of births and pregnancies unintended, as input into the model.

| UNPD Subregion  | Country   | Years     | Representative | Event             | Measure    | Percent   | Reference      |
|-----------------|-----------|-----------|----------------|-------------------|------------|-----------|----------------|
| Central America | Guatemala | 1998-1999 | yes            | unintended births | married    | 74.5-90.6 | DHS micro-data |
| Central America | Honduras  | 2005-2006 | yes            | births            | unintended | 50.0      | DHS micro-data |
| Central America | Honduras  | 2011-2012 | yes            | births            | unintended | 42.8      | DHS micro-data |
| Central America | Honduras  | 1992-1996 | yes            | births            | unintended | 35.6      | RHS report     |
| Central America | Honduras  | 1999-2001 | yes            | births            | unintended | 49.1      | RHS report     |
| Central America | Honduras  | 2005-2006 | yes            | unintended births | married    | 56.0-86.7 | DHS micro-data |
| Central America | Honduras  | 2011-2012 | yes            | unintended births | married    | 48.4-78.7 | DHS micro-data |
| Central America | Nicaragua | 1998-1998 | yes            | births            | unintended | 36.3      | DHS micro-data |
| Central America | Nicaragua | 2001-2001 | yes            | births            | unintended | 49.4      | DHS micro-data |
| Central America | Nicaragua | 1990-1993 | no             | births            | unintended | 14.7      | RHS report     |
| Central America | Nicaragua | 2002-2007 | yes            | births            | unintended | 36.7      | RHS report     |
| Central America | Nicaragua | 1998-1998 | yes            | unintended births | married    | 51.7-96.3 | DHS micro-data |
| Central America | Nicaragua | 2001-2001 | yes            | unintended births | married    | 53.0-88.4 | DHS micro-data |
| Eastern Africa  | Burundi   | 2010-2010 | yes            | births            | unintended | 36.7      | DHS micro-data |
| Eastern Africa  | Burundi   | 2010-2010 | yes            | unintended births | married    | 82.1-93.1 | DHS micro-data |
| Eastern Africa  | Comoros   | 1996-1996 | yes            | births            | unintended | 57.8      | DHS micro-data |
| Eastern Africa  | Comoros   | 2012-2012 | yes            | births            | unintended | 38.7      | DHS micro-data |
| Eastern Africa  | Comoros   | 1996-1996 | yes            | unintended births | married    | 66.9-96.2 | DHS micro-data |
| Eastern Africa  | Comoros   | 2012-2012 | yes            | unintended births | married    | 72.6-97.2 | DHS micro-data |
| Eastern Africa  | Eritrea   | 1993-1996 | yes            | births            | unintended | 18.5      | DHS report     |
| Eastern Africa  | Eritrea   | 1998-2002 | yes            | births            | unintended | 25.6      | DHS report     |
| Eastern Africa  | Ethiopia  | 2000-2000 | yes            | births            | unintended | 41.2      | DHS micro-data |
| Eastern Africa  | Ethiopia  | 2005-2005 | yes            | births            | unintended | 41.1      | DHS micro-data |
| Eastern Africa  | Ethiopia  | 2011-2011 | yes            | births            | unintended | 34.6      | DHS micro-data |
| Eastern Africa  | Ethiopia  | 2000-2000 | yes            | unintended births | married    | 64.7-96.3 | DHS micro-data |
| Eastern Africa  | Ethiopia  | 2005-2005 | yes            | unintended births | married    | 75.6-97.5 | DHS micro-data |
| Eastern Africa  | Ethiopia  | 2011-2011 | yes            | unintended births | married    | 72.8-95.6 | DHS micro-data |
| Eastern Africa  | Kenya     | 1993-1993 | yes            | births            | unintended | 57.5      | DHS micro-data |
| Eastern Africa  | Kenya     | 1998-1998 | yes            | births            | unintended | 51.2      | DHS micro-data |
| Eastern Africa  | Kenya     | 2003-2003 | yes            | births            | unintended | 49.9      | DHS micro-data |
| Eastern Africa  | Kenya     | 2008-2009 | yes            | births            | unintended | 48.6      | DHS micro-data |
| Eastern Africa  | Kenya     | 2014-2014 | yes            | births            | unintended | 41.0      | DHS micro-data |
| Eastern Africa  | Kenya     | 1993-1993 | yes            | unintended births | married    | 70.7-80.8 | DHS micro-data |
| Eastern Africa  | Kenya     | 1998-1998 | yes            | unintended births | married    | 69.2-78.2 | DHS micro-data |
| Eastern Africa  | Kenya     | 2003-2003 | yes            | unintended births | married    | 67.7-79.7 | DHS micro-data |
| Eastern Africa  | Kenya     | 2008-2009 | yes            | unintended births | married    | 63.8-76.2 | DHS micro-data |
| Eastern Africa  | Kenya     | 2014-2014 | yes            | unintended births | married    | 58.6-71.8 | DHS micro-data |

Table 8: Data on the proportions of births and pregnancies unintended, as input into the model.

| UNPD Subregion | Country    | Years     | Representative | Event             | Measure    | Percent   | Reference      |
|----------------|------------|-----------|----------------|-------------------|------------|-----------|----------------|
| Eastern Africa | Madagascar | 2004–2004 | yes            | births            | unintended | 18.5      | DHS micro-data |
| Eastern Africa | Madagascar | 1992–1992 | yes            | births            | unintended | 27.8      | DHS micro-data |
| Eastern Africa | Madagascar | 1997–1997 | yes            | births            | unintended | 29.1      | DHS micro-data |
| Eastern Africa | Madagascar | 2008–2009 | yes            | births            | unintended | 15.7      | DHS micro-data |
| Eastern Africa | Madagascar | 2004–2004 | yes            | unintended births | married    | 56.1–84.7 | DHS micro-data |
| Eastern Africa | Madagascar | 1992–1992 | yes            | unintended births | married    | 55.0–86.5 | DHS micro-data |
| Eastern Africa | Madagascar | 1997–1997 | yes            | unintended births | married    | 57.3–86.3 | DHS micro-data |
| Eastern Africa | Madagascar | 2008–2009 | yes            | unintended births | married    | 55.9–83.8 | DHS micro-data |
| Eastern Africa | Malawi     | 1992–1992 | yes            | births            | unintended | 44.5      | DHS micro-data |
| Eastern Africa | Malawi     | 2000–2000 | yes            | births            | unintended | 47.7      | DHS micro-data |
| Eastern Africa | Malawi     | 2004–2004 | yes            | births            | unintended | 46.8      | DHS micro-data |
| Eastern Africa | Malawi     | 2010–2010 | yes            | births            | unintended | 47.9      | DHS micro-data |
| Eastern Africa | Malawi     | 1992–1992 | yes            | unintended births | married    | 60.4–88.6 | DHS micro-data |
| Eastern Africa | Malawi     | 2000–2000 | yes            | unintended births | married    | 64.4–88.6 | DHS micro-data |
| Eastern Africa | Malawi     | 2004–2004 | yes            | unintended births | married    | 63.9–89.5 | DHS micro-data |
| Eastern Africa | Malawi     | 2010–2010 | yes            | unintended births | married    | 63.0–89.5 | DHS micro-data |
| Eastern Africa | Mozambique | 1997–1997 | yes            | births            | unintended | 22.3      | DHS micro-data |
| Eastern Africa | Mozambique | 2003–2003 | yes            | births            | unintended | 23.5      | DHS micro-data |
| Eastern Africa | Mozambique | 2011–2011 | yes            | births            | unintended | 17.0      | DHS micro-data |
| Eastern Africa | Mozambique | 1997–1997 | yes            | unintended births | married    | 56.6–81.7 | DHS micro-data |
| Eastern Africa | Mozambique | 2003–2003 | yes            | unintended births | married    | 51.6–79.3 | DHS micro-data |
| Eastern Africa | Mozambique | 2011–2011 | yes            | unintended births | married    | 55.7–75.1 | DHS micro-data |
| Eastern Africa | Rwanda     | 1992–1992 | yes            | births            | unintended | 53.0      | DHS micro-data |
| Eastern Africa | Rwanda     | 2000–2000 | yes            | births            | unintended | 37.4      | DHS micro-data |
| Eastern Africa | Rwanda     | 2005–2005 | yes            | births            | unintended | 47.2      | DHS micro-data |
| Eastern Africa | Rwanda     | 2007–2008 | yes            | births            | unintended | 43.7      | DHS micro-data |
| Eastern Africa | Rwanda     | 2010–2010 | yes            | births            | unintended | 43.1      | DHS micro-data |
| Eastern Africa | Rwanda     | 2014–2015 | yes            | births            | unintended | 41.3      | DHS micro-data |
| Eastern Africa | Rwanda     | 1992–1992 | yes            | unintended births | married    | 77.2–92.9 | DHS micro-data |
| Eastern Africa | Rwanda     | 2000–2000 | yes            | unintended births | married    | 74.6–94.1 | DHS micro-data |
| Eastern Africa | Rwanda     | 2005–2005 | yes            | unintended births | married    | 73.3–91.4 | DHS micro-data |
| Eastern Africa | Rwanda     | 2010–2010 | yes            | unintended births | married    | 64.9–81.6 | DHS micro-data |
| Eastern Africa | Rwanda     | 2014–2015 | yes            | unintended births | married    | 60.6–75.2 | DHS micro-data |
| Eastern Africa | Tanzania   | 1991–1992 | yes            | births            | unintended | 28.9      | DHS micro-data |
| Eastern Africa | Tanzania   | 1996–1996 | yes            | births            | unintended | 26.7      | DHS micro-data |
| Eastern Africa | Tanzania   | 1999–1999 | yes            | births            | unintended | 28.3      | DHS micro-data |
| Eastern Africa | Tanzania   | 2004–2005 | yes            | births            | unintended | 28.0      | DHS micro-data |

Table 8: Data on the proportions of births and pregnancies unintended, as input into the model.

| UNPD Subregion | Country           | Years     | Representative | Event             | Measure    | Percent   | Reference       |
|----------------|-------------------|-----------|----------------|-------------------|------------|-----------|-----------------|
| Eastern Africa | Tanzania          | 2010–2010 | yes            | births            | unintended | 30.9      | DHS micro-data  |
| Eastern Africa | Tanzania          | 1991–1992 | yes            | unintended births | married    | 60.8–85.2 | DHS micro-data  |
| Eastern Africa | Tanzania          | 1996–1996 | yes            | unintended births | married    | 64.2–84.1 | DHS micro-data  |
| Eastern Africa | Tanzania          | 1999–1999 | yes            | unintended births | married    | 56.8–82.9 | DHS micro-data  |
| Eastern Africa | Tanzania          | 2004–2005 | yes            | unintended births | married    | 65.3–84.4 | DHS micro-data  |
| Eastern Africa | Tanzania          | 2010–2010 | yes            | unintended births | married    | 59.0–80.6 | DHS micro-data  |
| Eastern Africa | Uganda            | 1996–1996 | yes            | births            | unintended | 32.7      | DHS micro-data  |
| Eastern Africa | Uganda            | 2000–2001 | yes            | births            | unintended | 48.2      | DHS micro-data  |
| Eastern Africa | Uganda            | 2006–2006 | yes            | births            | unintended | 54.3      | DHS micro-data  |
| Eastern Africa | Uganda            | 2011–2011 | yes            | births            | unintended | 52.0      | DHS micro-data  |
| Eastern Africa | Uganda            | 1996–1996 | yes            | unintended births | married    | 65.7–87.7 | DHS micro-data  |
| Eastern Africa | Uganda            | 2000–2001 | yes            | unintended births | married    | 65.4–89.7 | DHS micro-data  |
| Eastern Africa | Uganda            | 2006–2006 | yes            | unintended births | married    | 66.4–88.8 | DHS micro-data  |
| Eastern Africa | Uganda            | 2011–2011 | yes            | unintended births | married    | 63.8–86.8 | DHS micro-data  |
| Eastern Africa | Zambia            | 1992–1992 | yes            | births            | unintended | 39.0      | DHS micro-data  |
| Eastern Africa | Zambia            | 1996–1996 | yes            | births            | unintended | 42.0      | DHS micro-data  |
| Eastern Africa | Zambia            | 2001–2002 | yes            | births            | unintended | 47.8      | DHS micro-data  |
| Eastern Africa | Zambia            | 2007–2007 | yes            | births            | unintended | 49.0      | DHS micro-data  |
| Eastern Africa | Zambia            | 2013–2014 | yes            | births            | unintended | 44.0      | DHS micro-data  |
| Eastern Africa | Zambia            | 1992–1992 | yes            | unintended births | married    | 61.0–82.2 | DHS micro-data  |
| Eastern Africa | Zambia            | 1996–1996 | yes            | unintended births | married    | 66.5–84.7 | DHS micro-data  |
| Eastern Africa | Zambia            | 2001–2002 | yes            | unintended births | married    | 61.4–81.0 | DHS micro-data  |
| Eastern Africa | Zambia            | 2007–2007 | yes            | unintended births | married    | 61.6–80.6 | DHS micro-data  |
| Eastern Africa | Zambia            | 2013–2014 | yes            | unintended births | married    | 55.0–73.6 | DHS micro-data  |
| Eastern Africa | Zimbabwe          | 1994–1994 | yes            | births            | unintended | 46.2      | DHS micro-data  |
| Eastern Africa | Zimbabwe          | 1999–1999 | yes            | births            | unintended | 39.8      | DHS micro-data  |
| Eastern Africa | Zimbabwe          | 2005–2006 | yes            | births            | unintended | 33.4      | DHS micro-data  |
| Eastern Africa | Zimbabwe          | 2010–2011 | yes            | births            | unintended | 35.7      | DHS micro-data  |
| Eastern Africa | Zimbabwe          | 1994–1994 | yes            | unintended births | married    | 64.2–83.3 | DHS micro-data  |
| Eastern Africa | Zimbabwe          | 1999–1999 | yes            | unintended births | married    | 54.4–70.9 | DHS micro-data  |
| Eastern Africa | Zimbabwe          | 2005–2006 | yes            | unintended births | married    | 55.9–74.4 | DHS micro-data  |
| Eastern Africa | Zimbabwe          | 2010–2011 | yes            | unintended births | married    | 54.8–76.1 | DHS micro-data  |
| Eastern Asia   | Japan             | 1997–1997 | no             | births            | unintended | 41.8      | Iwasawa 2001    |
| Eastern Asia   | Japan             | 1997–1997 | no             | births            | unmet      | 13.2      | Iwasawa 2001    |
| Eastern Asia   | Japan             | 1997–1997 | no             | births            | users      | 28.6      | Iwasawa 2001    |
| Eastern Asia   | Republic of Korea | 2004–2004 | no             | births            | unintended | 48.0      | Han et al. 2005 |
| Eastern Europe | Czech Republic    | 1990–1993 | yes            | births            | unintended | 12.7      | RHS report      |

Table 8: Data on the proportions of births and pregnancies unintended, as input into the model.

| UNPD Subregion | Country                  | Years     | Representative | Event             | Measure    | Percent   | Reference      |
|----------------|--------------------------|-----------|----------------|-------------------|------------|-----------|----------------|
| Eastern Europe | Republic of Moldova      | 2005–2005 | yes            | births            | unintended | 19.3      | DHS micro-data |
| Eastern Europe | Republic of Moldova      | 1993–1997 | yes            | births            | unintended | 12.5      | RHS report     |
| Eastern Europe | Republic of Moldova      | 2005–2005 | yes            | unintended births | married    | 80.6–91.8 | DHS micro-data |
| Eastern Europe | Romania                  | 2002–2004 | yes            | births            | unintended | 26.9      | RHS report     |
| Eastern Europe | Romania                  | 1990–1993 | no             | births            | unintended | 16.9      | RHS report     |
| Eastern Europe | Romania                  | 1995–1999 | yes            | births            | unintended | 11.8      | RHS report     |
| Eastern Europe | Russian Federation       | 2007–2011 | yes            | births            | unintended | 16.2      | RHS report     |
| Eastern Europe | Russian Federation       | 1992–1996 | no             | births            | unintended | 10.3      | RHS report     |
| Eastern Europe | Russian Federation       | 1992–1996 | no             | births            | unintended | 8.6       | RHS report     |
| Eastern Europe | Russian Federation       | 1992–1996 | no             | births            | unintended | 10.0      | RHS report     |
| Eastern Europe | Ukraine                  | 2007–2007 | yes            | births            | unintended | 13.8      | DHS micro-data |
| Eastern Europe | Ukraine                  | 1995–1999 | yes            | births            | unintended | 17.6      | RHS report     |
| Eastern Europe | Ukraine                  | 2007–2007 | yes            | unintended births | married    | 55.1–72.2 | DHS micro-data |
| Middle Africa  | Cameroon                 | 1991–1991 | yes            | births            | unintended | 24.3      | DHS micro-data |
| Middle Africa  | Cameroon                 | 1998–1998 | yes            | births            | unintended | 27.7      | DHS micro-data |
| Middle Africa  | Cameroon                 | 2004–2004 | yes            | births            | unintended | 26.0      | DHS micro-data |
| Middle Africa  | Cameroon                 | 2011–2011 | yes            | births            | unintended | 28.9      | DHS micro-data |
| Middle Africa  | Cameroon                 | 1991–1991 | yes            | unintended births | married    | 63.8–80.7 | DHS micro-data |
| Middle Africa  | Cameroon                 | 1998–1998 | yes            | unintended births | married    | 62.9–85.1 | DHS micro-data |
| Middle Africa  | Cameroon                 | 2004–2004 | yes            | unintended births | married    | 58.9–79.0 | DHS micro-data |
| Middle Africa  | Cameroon                 | 2011–2011 | yes            | unintended births | married    | 61.1–80.9 | DHS micro-data |
| Middle Africa  | Central African Republic | 1994–1995 | yes            | births            | unintended | 24.8      | DHS micro-data |
| Middle Africa  | Central African Republic | 1994–1995 | yes            | unintended births | married    | 54.0–87.5 | DHS micro-data |
| Middle Africa  | Chad                     | 1996–1996 | yes            | births            | unintended | 10.7      | DHS micro-data |
| Middle Africa  | Chad                     | 2004–2004 | yes            | births            | unintended | 19.6      | DHS micro-data |
| Middle Africa  | Chad                     | 2014–2015 | yes            | births            | unintended | 14.0      | DHS micro-data |
| Middle Africa  | Chad                     | 1996–1996 | yes            | unintended births | married    | 78.9–96.2 | DHS micro-data |
| Middle Africa  | Chad                     | 2004–2004 | yes            | unintended births | married    | 81.6–95.9 | DHS micro-data |
| Middle Africa  | Chad                     | 2014–2015 | yes            | unintended births | married    | 80.2–91.4 | DHS micro-data |
| Middle Africa  | Congo                    | 2007–2007 | yes            | births            | unintended | 35.7      | DHS micro-data |
| Middle Africa  | Congo                    | 2013–2014 | yes            | births            | unintended | 35.9      | DHS micro-data |
| Middle Africa  | Congo                    | 2007–2007 | yes            | unintended births | married    | 66.8–88.6 | DHS micro-data |
| Middle Africa  | Congo                    | 2013–2014 | yes            | unintended births | married    | 63.3–82.9 | DHS micro-data |
| Middle Africa  | Congo                    | 2005–2005 | yes            | births            | unintended | 38.5      | DHS micro-data |
| Middle Africa  | Congo                    | 2011–2012 | yes            | births            | unintended | 32.5      | DHS micro-data |
| Middle Africa  | Congo                    | 2005–2005 | yes            | unintended births | married    | 47.7–70.0 | DHS micro-data |
| Middle Africa  | Congo                    | 2011–2012 | yes            | unintended births | married    | 46.7–74.9 | DHS micro-data |



Table 8: Data on the proportions of births and pregnancies unintended, as input into the model.

| UNPD Subregion   | Country               | Years     | Representative | Event             | Measure    | Percent   | Reference                         |
|------------------|-----------------------|-----------|----------------|-------------------|------------|-----------|-----------------------------------|
| Middle Africa    | Gabon                 | 2000–2000 | yes            | births            | unintended | 52.5      | DHS micro-data                    |
| Middle Africa    | Gabon                 | 2012–2012 | yes            | births            | unintended | 43.9      | DHS micro-data                    |
| Middle Africa    | Gabon                 | 2000–2000 | yes            | unintended births | married    | 43.2–68.4 | DHS micro-data                    |
| Middle Africa    | Gabon                 | 2012–2012 | yes            | unintended births | married    | 40.8–61.1 | DHS micro-data                    |
| Middle Africa    | Sao Tome and Principe | 2008–2009 | yes            | births            | unintended | 51.4      | DHS micro-data                    |
| Middle Africa    | Sao Tome and Principe | 2008–2009 | yes            | unintended births | married    | 50.0–87.9 | DHS micro-data                    |
| Northern Africa  | Egypt                 | 1992–1992 | yes            | births            | unintended | 37.8      | DHS micro-data                    |
| Northern Africa  | Egypt                 | 1995–1995 | yes            | births            | unintended | 32.6      | DHS micro-data                    |
| Northern Africa  | Egypt                 | 2000–2000 | yes            | births            | unintended | 18.0      | DHS micro-data                    |
| Northern Africa  | Egypt                 | 2005–2005 | yes            | births            | unintended | 19.6      | DHS micro-data                    |
| Northern Africa  | Egypt                 | 2008–2008 | yes            | births            | unintended | 14.1      | DHS micro-data                    |
| Northern Africa  | Egypt                 | 2014–2014 | yes            | births            | unintended | 17.2      | DHS micro-data                    |
| Northern Africa  | Egypt                 | 1992–1992 | yes            | unintended births | married    | 93.7–99.7 | DHS micro-data                    |
| Northern Africa  | Egypt                 | 1995–1995 | yes            | unintended births | married    | 95.0–99.6 | DHS micro-data                    |
| Northern Africa  | Egypt                 | 2000–2000 | yes            | unintended births | married    | 92.6–99.1 | DHS micro-data                    |
| Northern Africa  | Egypt                 | 2005–2005 | yes            | unintended births | married    | 94.8–98.0 | DHS micro-data                    |
| Northern Africa  | Egypt                 | 2008–2008 | yes            | unintended births | married    | 96.5–98.4 | DHS micro-data                    |
| Northern Africa  | Egypt                 | 2014–2014 | yes            | unintended births | married    | 93.4–98.3 | DHS micro-data                    |
| Northern Africa  | Morocco               | 1992–1992 | yes            | births            | unintended | 34.6      | DHS micro-data                    |
| Northern Africa  | Morocco               | 2003–2004 | yes            | births            | unintended | 31.5      | DHS micro-data                    |
| Northern Africa  | Morocco               | 1992–1992 | yes            | unintended births | married    | 90.7–98.9 | DHS micro-data                    |
| Northern Africa  | Morocco               | 2003–2004 | yes            | unintended births | married    | 92.2–98.8 | DHS micro-data                    |
| Northern Africa  | Sudan                 | 1990–1990 | yes            | births            | unintended | 25.8      | DHS report                        |
| Northern America | United States         | 1998–2002 | yes            | births            | unintended | 34.9      | National Survey for Family Growth |
| Northern America | United States         | 2002–2010 | yes            | births            | unintended | 39.3      | National Survey for Family Growth |
| Northern America | United States         | 2007–2013 | yes            | births            | unintended | 34.2      | National Survey for Family Growth |
| Northern America | United States         | 2007–2013 | yes            | unintended births | married    | 66.0      | National Survey for Family Growth |
| Northern Europe  | Denmark               | 2008–2010 | no             | births            | unintended | 12.9      | Lukasse et al. 2015               |
| Northern Europe  | Denmark               | 2012–2012 | no             | pregnancies       | unintended | 2.0–23.0  | Backhausen et al. 2014            |
| Northern Europe  | Estonia               | 2008–2010 | no             | births            | unintended | 22.8      | Lukasse et al. 2015               |
| Northern Europe  | Norway                | 2008–2010 | no             | births            | unintended | 21.1      | Lukasse et al. 2015               |
| Northern Europe  | Sweden                | 2008–2010 | no             | births            | unintended | 23.2      | Lukasse et al. 2015               |
| Northern Europe  | Sweden                | 2010–2010 | no             | pregnancies       | unintended | 10.0–24.8 | Tyden et al. 2011                 |
| Northern Europe  | Sweden                | 2012–2013 | no             | pregnancies       | unintended | 12.0–26.0 | Stern et al. 2016                 |
| Northern Europe  | United Kingdom        | 2010–2012 | yes            | births            | unintended | 5.7–33.7  | Wellings et al. 2013              |
| Oceania          | Australia             | 2006–2008 | yes            | births            | unintended | 32.9      | Melbourne Institute 2008          |
| Oceania          | Australia             | 2003–2005 | yes            | births            | unintended | 32.5      | Melbourne Institute 2005          |

Table 8: Data on the proportions of births and pregnancies unintended, as input into the model.

| UNPD Subregion | Country         | Years     | Representative | Event             | Measure    | Percent   | Reference         |
|----------------|-----------------|-----------|----------------|-------------------|------------|-----------|-------------------|
| Oceania        | Australia       | 2011–2011 | no             | pregnancies       | unintended | 2.4–32.4  | Rassi et al. 2013 |
| Oceania        | Samoa           | 2005–2009 | yes            | births            | unintended | 14.9      | DHS report        |
| Oceania        | Solomon Islands | 2002–2007 | yes            | births            | unintended | 57.6      | DHS report        |
| Oceania        | Vanuatu         | 2009–2013 | yes            | births            | unintended | 29.3      | DHS report        |
| South America  | Bolivia         | 1994–1994 | yes            | births            | unintended | 55.6      | DHS micro-data    |
| South America  | Bolivia         | 1998–1998 | yes            | births            | unintended | 54.4      | DHS micro-data    |
| South America  | Bolivia         | 2003–2003 | yes            | births            | unintended | 63.7      | DHS micro-data    |
| South America  | Bolivia         | 2008–2008 | yes            | births            | unintended | 63.1      | DHS micro-data    |
| South America  | Bolivia         | 1994–1994 | yes            | unintended births | married    | 81.0–89.3 | DHS micro-data    |
| South America  | Bolivia         | 1998–1998 | yes            | unintended births | married    | 75.2–87.4 | DHS micro-data    |
| South America  | Bolivia         | 2003–2003 | yes            | unintended births | married    | 72.2–83.0 | DHS micro-data    |
| South America  | Bolivia         | 2008–2008 | yes            | unintended births | married    | 70.0–81.1 | DHS micro-data    |
| South America  | Brazil          | 1996–1996 | yes            | births            | unintended | 51.7      | DHS micro-data    |
| South America  | Brazil          | 2002–2007 | yes            | births            | unintended | 45.9      | DHS report        |
| South America  | Brazil          | 1996–1996 | yes            | unintended births | married    | 56.2–75.1 | DHS micro-data    |
| South America  | Colombia        | 1990–1990 | yes            | births            | unintended | 39.2      | DHS micro-data    |
| South America  | Colombia        | 1995–1995 | yes            | births            | unintended | 48.7      | DHS micro-data    |
| South America  | Colombia        | 2000–2000 | yes            | births            | unintended | 57.0      | DHS micro-data    |
| South America  | Colombia        | 2005–2005 | yes            | births            | unintended | 56.0      | DHS micro-data    |
| South America  | Colombia        | 2010–2010 | yes            | births            | unintended | 52.9      | DHS micro-data    |
| South America  | Colombia        | 1990–1990 | yes            | unintended births | married    | 66.4–84.8 | DHS micro-data    |
| South America  | Colombia        | 1995–1995 | yes            | unintended births | married    | 58.2–80.3 | DHS micro-data    |
| South America  | Colombia        | 2000–2000 | yes            | unintended births | married    | 49.9–69.3 | DHS micro-data    |
| South America  | Colombia        | 2005–2005 | yes            | unintended births | married    | 44.8–71.7 | DHS micro-data    |
| South America  | Colombia        | 2010–2010 | yes            | unintended births | married    | 40.0–65.8 | DHS micro-data    |
| South America  | Ecuador         | 1990–1994 | no             | births            | unintended | 35.6      | RHS report        |
| South America  | Ecuador         | 2000–2004 | yes            | births            | unintended | 36.3      | RHS report        |
| South America  | Ecuador         | 1995–1999 | yes            | births            | unintended | 37.5      | RHS report        |
| South America  | Guyana          | 2009–2009 | yes            | births            | unintended | 42.1      | DHS micro-data    |
| South America  | Guyana          | 2009–2009 | yes            | unintended births | married    | 55.8–73.8 | DHS micro-data    |
| South America  | Paraguay        | 1990–1990 | yes            | births            | unintended | 25.4      | DHS micro-data    |
| South America  | Paraguay        | 1996–1998 | yes            | births            | unintended | 18.1      | RHS report        |
| South America  | Paraguay        | 2004–2008 | yes            | births            | unintended | 30.9      | RHS report        |
| South America  | Paraguay        | 2000–2004 | yes            | births            | unintended | 27.9      | RHS report        |
| South America  | Paraguay        | 1991–1996 | yes            | births            | unintended | 21.3      | RHS report        |
| South America  | Paraguay        | 1990–1990 | yes            | unintended births | married    | 74.8–86.1 | DHS micro-data    |
| South America  | Peru            | 1991–1992 | yes            | births            | unintended | 59.8      | DHS micro-data    |

Table 8: Data on the proportions of births and pregnancies unintended, as input into the model.

| UNPD Subregion         | Country    | Years     | Representative | Event             | Measure    | Percent   | Reference             |
|------------------------|------------|-----------|----------------|-------------------|------------|-----------|-----------------------|
| South America          | Peru       | 1996–1996 | yes            | births            | unintended | 59.4      | DHS micro-data        |
| South America          | Peru       | 2000–2000 | yes            | births            | unintended | 56.2      | DHS micro-data        |
| South America          | Peru       | 2004–2004 | yes            | births            | unintended | 56.6      | DHS micro-data        |
| South America          | Peru       | 2009–2009 | yes            | births            | unintended | 55.0      | DHS micro-data        |
| South America          | Peru       | 2010–2010 | yes            | births            | unintended | 58.6      | DHS micro-data        |
| South America          | Peru       | 2011–2011 | yes            | births            | unintended | 58.1      | DHS micro-data        |
| South America          | Peru       | 2012–2012 | yes            | births            | unintended | 56.2      | DHS micro-data        |
| South America          | Peru       | 2014–2014 | yes            | births            | unintended | 55.1      | DHS micro-data        |
| South America          | Peru       | 1991–1992 | yes            | unintended births | married    | 74.1–86.5 | DHS micro-data        |
| South America          | Peru       | 1996–1996 | yes            | unintended births | married    | 75.4–85.7 | DHS micro-data        |
| South America          | Peru       | 2000–2000 | yes            | unintended births | married    | 66.2–78.3 | DHS micro-data        |
| South America          | Peru       | 2004–2004 | yes            | unintended births | married    | 64.2–77.1 | DHS micro-data        |
| South America          | Peru       | 2009–2009 | yes            | unintended births | married    | 69.7–73.7 | DHS micro-data        |
| South America          | Peru       | 2010–2010 | yes            | unintended births | married    | 61.0–74.4 | DHS micro-data        |
| South America          | Peru       | 2011–2011 | yes            | unintended births | married    | 62.9–76.4 | DHS micro-data        |
| South America          | Peru       | 2012–2012 | yes            | unintended births | married    | 60.5–72.7 | DHS micro-data        |
| South America          | Peru       | 2014–2014 | yes            | unintended births | married    | 58.4–72.5 | DHS micro-data        |
| South and central Asia | Bangladesh | 1993–1994 | no             | births            | unintended | 33.8      | DHS micro-data        |
| South and central Asia | Bangladesh | 1996–1997 | no             | births            | unintended | 31.3      | DHS micro-data        |
| South and central Asia | Bangladesh | 1999–2000 | no             | births            | unintended | 34.0      | DHS micro-data        |
| South and central Asia | Bangladesh | 2004–2004 | no             | births            | unintended | 32.2      | DHS micro-data        |
| South and central Asia | Bangladesh | 2007–2007 | no             | births            | unintended | 30.3      | DHS micro-data        |
| South and central Asia | Bangladesh | 2011–2011 | no             | births            | unintended | 29.7      | DHS micro-data        |
| South and central Asia | Bangladesh | 2014–2014 | no             | births            | unintended | 24.1      | DHS micro-data        |
| South and central Asia | India      | 1992–1993 | no             | births            | unintended | 24.0      | DHS micro-data        |
| South and central Asia | India      | 1998–1999 | no             | births            | unintended | 21.6      | DHS micro-data        |
| South and central Asia | India      | 2005–2006 | yes            | births            | unintended | 21.8      | DHS micro-data        |
| South and central Asia | India      | 2005–2006 | yes            | unintended births | married    | 95.1–98.1 | DHS micro-data        |
| South and central Asia | Iran       | 2009–2009 | no             | pregnancies       | unintended | 20.8      | Erfani 2013           |
| South and central Asia | Iran       | 2000–2000 | no             | pregnancies       | unintended | 32.3      | Erfani 2013           |
| South and central Asia | Iran       | 2005–2009 | no             | pregnancies       | unintended | 24.1      | Erfani 2013           |
| South and central Asia | Iran       | 2013–2014 | no             | births            | unintended | 11.1–33.7 | Roshanaei et al. 2015 |
| South and central Asia | Iran       | 2005–2009 | no             | pregnancies       | users      | 68.3      | Erfani 2013           |
| South and central Asia | Kazakhstan | 1999–1999 | yes            | births            | unintended | 20.5      | DHS micro-data        |
| South and central Asia | Kazakhstan | 1995–1995 | yes            | births            | unintended | 17.9      | DHS micro-data        |
| South and central Asia | Kazakhstan | 1999–1999 | yes            | unintended births | married    | 94.4–97.6 | DHS micro-data        |
| South and central Asia | Kazakhstan | 1995–1995 | yes            | unintended births | married    | 79.2–91.6 | DHS micro-data        |

Table 8: Data on the proportions of births and pregnancies unintended, as input into the model.

| UNPD Subregion         | Country      | Years     | Representative | Event             | Measure    | Percent   | Reference      |
|------------------------|--------------|-----------|----------------|-------------------|------------|-----------|----------------|
| South and central Asia | Kyrgyzstan   | 1997–1997 | yes            | births            | unintended | 14.1      | DHS micro-data |
| South and central Asia | Kyrgyzstan   | 2012–2012 | yes            | births            | unintended | 3.7       | DHS micro-data |
| South and central Asia | Kyrgyzstan   | 1997–1997 | yes            | unintended births | married    | 94.4–98.1 | DHS micro-data |
| South and central Asia | Kyrgyzstan   | 2012–2012 | yes            | unintended births | married    | 92.3–100  | DHS micro-data |
| South and central Asia | Maldives     | 2009–2009 | yes            | births            | unintended | 23.5      | DHS micro-data |
| South and central Asia | Maldives     | 2009–2009 | yes            | unintended births | married    | 72.3–96.5 | DHS micro-data |
| South and central Asia | Nepal        | 1996–1996 | yes            | births            | unintended | 39.8      | DHS micro-data |
| South and central Asia | Nepal        | 2001–2001 | yes            | births            | unintended | 40.2      | DHS micro-data |
| South and central Asia | Nepal        | 2006–2006 | yes            | births            | unintended | 35.9      | DHS micro-data |
| South and central Asia | Nepal        | 2011–2011 | yes            | births            | unintended | 29.0      | DHS micro-data |
| South and central Asia | Nepal        | 1996–1996 | yes            | unintended births | married    | 90.7–99.1 | DHS micro-data |
| South and central Asia | Nepal        | 2001–2001 | yes            | unintended births | married    | 91.1–98.6 | DHS micro-data |
| South and central Asia | Nepal        | 2006–2006 | yes            | unintended births | married    | 88.8–94.8 | DHS micro-data |
| South and central Asia | Nepal        | 2011–2011 | yes            | unintended births | married    | 88.4–95.7 | DHS micro-data |
| South and central Asia | Pakistan     | 1990–1991 | yes            | births            | unintended | 21.3      | DHS micro-data |
| South and central Asia | Pakistan     | 2006–2007 | yes            | births            | unintended | 26.8      | DHS micro-data |
| South and central Asia | Pakistan     | 2012–2013 | yes            | births            | unintended | 18.9      | DHS micro-data |
| South and central Asia | Pakistan     | 1990–1991 | yes            | unintended births | married    | 98.2–99.9 | DHS micro-data |
| South and central Asia | Pakistan     | 2006–2007 | yes            | unintended births | married    | 98.3–99.3 | DHS micro-data |
| South and central Asia | Pakistan     | 2012–2013 | yes            | unintended births | married    | 98.4–100  | DHS micro-data |
| South and central Asia | Sri Lanka    | 2002–2007 | yes            | births            | unintended | 17.3      | DHS report     |
| South and central Asia | Tajikistan   | 2012–2012 | yes            | births            | unintended | 5.6       | DHS micro-data |
| South and central Asia | Tajikistan   | 2012–2012 | yes            | unintended births | married    | 93.0–99.3 | DHS micro-data |
| South and central Asia | Turkmenistan | 1996–2000 | yes            | births            | unintended | 3.5       | DHS report     |
| South and central Asia | Uzbekistan   | 1996–1996 | yes            | births            | unintended | 4.9       | DHS micro-data |
| South and central Asia | Uzbekistan   | 1996–1996 | yes            | unintended births | married    | 100       | DHS micro-data |
| South-Eastern Asia     | Cambodia     | 2000–2000 | yes            | births            | unintended | 35.5      | DHS micro-data |
| South-Eastern Asia     | Cambodia     | 2005–2005 | yes            | births            | unintended | 30.0      | DHS micro-data |
| South-Eastern Asia     | Cambodia     | 2010–2010 | yes            | births            | unintended | 16.6      | DHS micro-data |
| South-Eastern Asia     | Cambodia     | 2014–2014 | yes            | births            | unintended | 17.8      | DHS micro-data |
| South-Eastern Asia     | Cambodia     | 2000–2000 | yes            | unintended births | married    | 89.3–98.8 | DHS micro-data |
| South-Eastern Asia     | Cambodia     | 2005–2005 | yes            | unintended births | married    | 87.8–98.5 | DHS micro-data |
| South-Eastern Asia     | Cambodia     | 2010–2010 | yes            | unintended births | married    | 88.1–97.4 | DHS micro-data |
| South-Eastern Asia     | Cambodia     | 2014–2014 | yes            | unintended births | married    | 82.2–94.2 | DHS micro-data |
| South-Eastern Asia     | Indonesia    | 1991–1991 | no             | births            | unintended | 23.5      | DHS micro-data |
| South-Eastern Asia     | Indonesia    | 1994–1994 | no             | births            | unintended | 19.4      | DHS micro-data |
| South-Eastern Asia     | Indonesia    | 1997–1997 | no             | births            | unintended | 17.9      | DHS micro-data |

Table 8: Data on the proportions of births and pregnancies unintended, as input into the model.

| UNPD Subregion     | Country      | Years     | Representative | Event             | Measure    | Percent   | Reference      |
|--------------------|--------------|-----------|----------------|-------------------|------------|-----------|----------------|
| South-Eastern Asia | Indonesia    | 2002–2003 | no             | births            | unintended | 17.1      | DHS micro-data |
| South-Eastern Asia | Indonesia    | 2007–2007 | no             | births            | unintended | 20.7      | DHS micro-data |
| South-Eastern Asia | Indonesia    | 2012–2012 | yes            | births            | unintended | 15.1      | DHS micro-data |
| South-Eastern Asia | Indonesia    | 2012–2012 | yes            | unintended births | married    | 85.6–94.3 | DHS micro-data |
| South-Eastern Asia | Philippines  | 1993–1993 | yes            | births            | unintended | 50.5      | DHS micro-data |
| South-Eastern Asia | Philippines  | 1998–1998 | yes            | births            | unintended | 51.1      | DHS micro-data |
| South-Eastern Asia | Philippines  | 2003–2003 | yes            | births            | unintended | 50.0      | DHS micro-data |
| South-Eastern Asia | Philippines  | 2008–2008 | yes            | births            | unintended | 40.7      | DHS micro-data |
| South-Eastern Asia | Philippines  | 2013–2013 | yes            | births            | unintended | 35.1      | DHS micro-data |
| South-Eastern Asia | Philippines  | 1993–1993 | yes            | unintended births | married    | 89.0–94.8 | DHS micro-data |
| South-Eastern Asia | Philippines  | 1998–1998 | yes            | unintended births | married    | 87.7–93.2 | DHS micro-data |
| South-Eastern Asia | Philippines  | 2003–2003 | yes            | unintended births | married    | 81.4–89.0 | DHS micro-data |
| South-Eastern Asia | Philippines  | 2008–2008 | yes            | unintended births | married    | 76.2–86.7 | DHS micro-data |
| South-Eastern Asia | Philippines  | 2013–2013 | yes            | unintended births | married    | 66.3–79.5 | DHS micro-data |
| South-Eastern Asia | Timor-Leste  | 2009–2010 | yes            | births            | unintended | 16.6      | DHS micro-data |
| South-Eastern Asia | Timor-Leste  | 2009–2010 | yes            | unintended births | married    | 94.4–97.5 | DHS micro-data |
| South-Eastern Asia | Vietnam      | 1997–1997 | yes            | births            | unintended | 25.9      | DHS micro-data |
| South-Eastern Asia | Vietnam      | 2002–2002 | yes            | births            | unintended | 24.9      | DHS micro-data |
| South-Eastern Asia | Vietnam      | 1997–1997 | yes            | unintended births | married    | 93.7–96.6 | DHS micro-data |
| South-Eastern Asia | Vietnam      | 2002–2002 | yes            | unintended births | married    | 87.7–92.0 | DHS micro-data |
| Southern Africa    | Lesotho      | 2004–2004 | yes            | births            | unintended | 56.5      | DHS micro-data |
| Southern Africa    | Lesotho      | 2009–2009 | yes            | births            | unintended | 59.1      | DHS micro-data |
| Southern Africa    | Lesotho      | 2014–2014 | yes            | births            | unintended | 49.2      | DHS micro-data |
| Southern Africa    | Lesotho      | 2004–2004 | yes            | unintended births | married    | 52.7–66.6 | DHS micro-data |
| Southern Africa    | Lesotho      | 2009–2009 | yes            | unintended births | married    | 58.5–65.9 | DHS micro-data |
| Southern Africa    | Lesotho      | 2014–2014 | yes            | unintended births | married    | 49.9–60.4 | DHS micro-data |
| Southern Africa    | Namibia      | 1992–1992 | yes            | births            | unintended | 38.2      | DHS micro-data |
| Southern Africa    | Namibia      | 2000–2000 | yes            | births            | unintended | 50.2      | DHS micro-data |
| Southern Africa    | Namibia      | 2006–2007 | yes            | births            | unintended | 56.3      | DHS micro-data |
| Southern Africa    | Namibia      | 2013–2013 | yes            | births            | unintended | 54.5      | DHS micro-data |
| Southern Africa    | Namibia      | 1992–1992 | yes            | unintended births | married    | 27.3–38.3 | DHS micro-data |
| Southern Africa    | Namibia      | 2000–2000 | yes            | unintended births | married    | 25.7–38.4 | DHS micro-data |
| Southern Africa    | Namibia      | 2006–2007 | yes            | unintended births | married    | 29.4–39.1 | DHS micro-data |
| Southern Africa    | Namibia      | 2013–2013 | yes            | unintended births | married    | 25.9–29.8 | DHS micro-data |
| Southern Africa    | South Africa | 1998–1998 | yes            | births            | unintended | 55.8      | DHS micro-data |
| Southern Africa    | South Africa | 1999–2004 | yes            | births            | unintended | 48.6      | DHS report     |
| Southern Africa    | South Africa | 1998–1998 | yes            | unintended births | married    | 32.5–40.1 | DHS micro-data |

Table 8: Data on the proportions of births and pregnancies unintended, as input into the model.

| UNPD Subregion  | Country       | Years     | Representative | Event             | Measure    | Percent   | Reference               |
|-----------------|---------------|-----------|----------------|-------------------|------------|-----------|-------------------------|
| Southern Africa | Swaziland     | 2006-2007 | yes            | births            | unintended | 71.5      | DHS micro-data          |
| Southern Europe | Albania       | 2008-2009 | yes            | births            | unintended | 13.4      | DHS micro-data          |
| Southern Europe | Albania       | 1998-2002 | yes            | births            | unintended | 8.0       | RHS report              |
| Southern Europe | Albania       | 2008-2009 | yes            | unintended births | married    | 97.5-98.5 | DHS micro-data          |
| Southern Europe | Italy         | 1990-1995 | yes            | births            | unintended | 21.0      | UNECE, 2000             |
| Southern Europe | Portugal      | 2007-2011 | yes            | births            | unintended | 29.5      | Branco et al. 2011      |
| Southern Europe | Portugal      | 1996-1996 | yes            | births            | unintended | 39.4      | Tavares & Barros 1996   |
| Southern Europe | Spain         | 1990-2003 | no             | births            | unintended | 21.6      | Font-Ribera et al. 2008 |
| Western Africa  | Benin         | 1996-1996 | yes            | births            | unintended | 29.7      | DHS micro-data          |
| Western Africa  | Benin         | 2001-2001 | yes            | births            | unintended | 27.2      | DHS micro-data          |
| Western Africa  | Benin         | 2006-2006 | yes            | births            | unintended | 23.3      | DHS micro-data          |
| Western Africa  | Benin         | 2011-2012 | yes            | births            | unintended | 22.6      | DHS micro-data          |
| Western Africa  | Benin         | 1996-1996 | yes            | unintended births | married    | 72.1-92.1 | DHS micro-data          |
| Western Africa  | Benin         | 2001-2001 | yes            | unintended births | married    | 68.6-88.3 | DHS micro-data          |
| Western Africa  | Benin         | 2006-2006 | yes            | unintended births | married    | 73.7-86.5 | DHS micro-data          |
| Western Africa  | Benin         | 2011-2012 | yes            | unintended births | married    | 71.3-83.8 | DHS micro-data          |
| Western Africa  | Burkina Faso  | 1993-1993 | yes            | births            | unintended | 28.2      | DHS micro-data          |
| Western Africa  | Burkina Faso  | 1998-1999 | yes            | births            | unintended | 25.1      | DHS micro-data          |
| Western Africa  | Burkina Faso  | 2003-2003 | yes            | births            | unintended | 27.2      | DHS micro-data          |
| Western Africa  | Burkina Faso  | 2010-2010 | yes            | births            | unintended | 10.3      | DHS micro-data          |
| Western Africa  | Burkina Faso  | 1993-1993 | yes            | unintended births | married    | 81.4-95.2 | DHS micro-data          |
| Western Africa  | Burkina Faso  | 1998-1999 | yes            | unintended births | married    | 81.5-96.7 | DHS micro-data          |
| Western Africa  | Burkina Faso  | 2003-2003 | yes            | unintended births | married    | 83.0-95.3 | DHS micro-data          |
| Western Africa  | Burkina Faso  | 2010-2010 | yes            | unintended births | married    | 72.1-86.8 | DHS micro-data          |
| Western Africa  | Cabo Verde    | 2001-2005 | no             | births            | unintended | 56.4      | DHS report              |
| Western Africa  | Cote d'Ivoire | 1994-1994 | yes            | births            | unintended | 29.9      | DHS micro-data          |
| Western Africa  | Cote d'Ivoire | 1998-1999 | yes            | births            | unintended | 33.6      | DHS micro-data          |
| Western Africa  | Cote d'Ivoire | 2011-2012 | yes            | births            | unintended | 28.5      | DHS micro-data          |
| Western Africa  | Cote d'Ivoire | 1994-1994 | yes            | unintended births | married    | 61.9-78.7 | DHS micro-data          |
| Western Africa  | Cote d'Ivoire | 1998-1999 | yes            | unintended births | married    | 46.6-69.5 | DHS micro-data          |
| Western Africa  | Cote d'Ivoire | 2011-2012 | yes            | unintended births | married    | 51.6-65.9 | DHS micro-data          |
| Western Africa  | Gambia        | 2013-2013 | yes            | births            | unintended | 16.1      | DHS micro-data          |
| Western Africa  | Gambia        | 2013-2013 | yes            | unintended births | married    | 75.1-85.9 | DHS micro-data          |
| Western Africa  | Ghana         | 1993-1993 | yes            | births            | unintended | 43.4      | DHS micro-data          |
| Western Africa  | Ghana         | 1998-1998 | yes            | births            | unintended | 41.3      | DHS micro-data          |
| Western Africa  | Ghana         | 2003-2003 | yes            | births            | unintended | 45.5      | DHS micro-data          |
| Western Africa  | Ghana         | 2008-2008 | yes            | births            | unintended | 43.5      | DHS micro-data          |

Table 8: Data on the proportions of births and pregnancies unintended, as input into the model.

| UNPD Subregion | Country    | Years     | Representative | Event             | Measure    | Percent   | Reference      |
|----------------|------------|-----------|----------------|-------------------|------------|-----------|----------------|
| Western Africa | Ghana      | 2014–2014 | yes            | births            | unintended | 36.2      | DHS micro-data |
| Western Africa | Ghana      | 1993–1993 | yes            | unintended births | married    | 58.0–88.3 | DHS micro-data |
| Western Africa | Ghana      | 1998–1998 | yes            | unintended births | married    | 64.3–93.0 | DHS micro-data |
| Western Africa | Ghana      | 2003–2003 | yes            | unintended births | married    | 63.4–89.8 | DHS micro-data |
| Western Africa | Ghana      | 2008–2008 | yes            | unintended births | married    | 60.1–83.6 | DHS micro-data |
| Western Africa | Ghana      | 2014–2014 | yes            | unintended births | married    | 61.1–80.0 | DHS micro-data |
| Western Africa | Guinea     | 1999–1999 | yes            | births            | unintended | 22.2      | DHS micro-data |
| Western Africa | Guinea     | 2005–2005 | yes            | births            | unintended | 18.1      | DHS micro-data |
| Western Africa | Guinea     | 2012–2012 | yes            | births            | unintended | 21.8      | DHS micro-data |
| Western Africa | Guinea     | 1999–1999 | yes            | unintended births | married    | 73.3–90.7 | DHS micro-data |
| Western Africa | Guinea     | 2005–2005 | yes            | unintended births | married    | 66.7–79.4 | DHS micro-data |
| Western Africa | Guinea     | 2012–2012 | yes            | unintended births | married    | 65.1–78.8 | DHS micro-data |
| Western Africa | Liberia    | 2007–2007 | yes            | births            | unintended | 34.5      | DHS micro-data |
| Western Africa | Liberia    | 2013–2013 | yes            | births            | unintended | 35.2      | DHS micro-data |
| Western Africa | Liberia    | 2007–2007 | yes            | unintended births | married    | 48.9–74.9 | DHS micro-data |
| Western Africa | Liberia    | 2013–2013 | yes            | unintended births | married    | 40.3–63.9 | DHS micro-data |
| Western Africa | Mali       | 1995–1996 | yes            | births            | unintended | 24.3      | DHS micro-data |
| Western Africa | Mali       | 2001–2001 | yes            | births            | unintended | 23.4      | DHS micro-data |
| Western Africa | Mali       | 2006–2006 | yes            | births            | unintended | 20.3      | DHS micro-data |
| Western Africa | Mali       | 2012–2013 | yes            | births            | unintended | 15.6      | DHS micro-data |
| Western Africa | Mali       | 1995–1996 | yes            | unintended births | married    | 77.9–90.1 | DHS micro-data |
| Western Africa | Mali       | 2001–2001 | yes            | unintended births | married    | 77.9–90.8 | DHS micro-data |
| Western Africa | Mali       | 2006–2006 | yes            | unintended births | married    | 78.1–93.8 | DHS micro-data |
| Western Africa | Mali       | 2012–2013 | yes            | unintended births | married    | 85.3–90.6 | DHS micro-data |
| Western Africa | Mauritania | 2001–2001 | yes            | births            | unintended | 31.7      | DHS micro-data |
| Western Africa | Mauritania | 2001–2001 | yes            | unintended births | married    | 71.0–97.7 | DHS micro-data |
| Western Africa | Niger      | 1992–1992 | yes            | births            | unintended | 14.6      | DHS micro-data |
| Western Africa | Niger      | 1998–1998 | yes            | births            | unintended | 13.2      | DHS micro-data |
| Western Africa | Niger      | 2006–2006 | yes            | births            | unintended | 12.5      | DHS micro-data |
| Western Africa | Niger      | 2012–2012 | yes            | births            | unintended | 10.0      | DHS micro-data |
| Western Africa | Niger      | 1992–1992 | yes            | unintended births | married    | 72.9–94.7 | DHS micro-data |
| Western Africa | Niger      | 1998–1998 | yes            | unintended births | married    | 67.4–94.6 | DHS micro-data |
| Western Africa | Niger      | 2006–2006 | yes            | unintended births | married    | 79.4–97.0 | DHS micro-data |
| Western Africa | Niger      | 2012–2012 | yes            | unintended births | married    | 79.3–98.3 | DHS micro-data |
| Western Africa | Nigeria    | 1990–1990 | yes            | births            | unintended | 13.4      | DHS micro-data |
| Western Africa | Nigeria    | 2003–2003 | yes            | births            | unintended | 17.5      | DHS micro-data |
| Western Africa | Nigeria    | 2008–2008 | yes            | births            | unintended | 12.5      | DHS micro-data |

Table 8: Data on the proportions of births and pregnancies unintended, as input into the model.

| UNPD Subregion | Country      | Years     | Representative | Event             | Measure    | Percent   | Reference      |
|----------------|--------------|-----------|----------------|-------------------|------------|-----------|----------------|
| Western Africa | Nigeria      | 2013-2013 | yes            | births            | unintended | 11.1      | DHS micro-data |
| Western Africa | Nigeria      | 1997-1999 | yes            | births            | unintended | 19.5      | DHS report     |
| Western Africa | Nigeria      | 1990-1990 | yes            | unintended births | married    | 73.8-91.4 | DHS micro-data |
| Western Africa | Nigeria      | 2003-2003 | yes            | unintended births | married    | 66.9-78.5 | DHS micro-data |
| Western Africa | Nigeria      | 2008-2008 | yes            | unintended births | married    | 67.9-79.4 | DHS micro-data |
| Western Africa | Nigeria      | 2013-2013 | yes            | unintended births | married    | 64.1-74.6 | DHS micro-data |
| Western Africa | Senegal      | 1992-1993 | yes            | births            | unintended | 33.9      | DHS micro-data |
| Western Africa | Senegal      | 1997-1997 | yes            | births            | unintended | 38.5      | DHS micro-data |
| Western Africa | Senegal      | 2005-2005 | yes            | births            | unintended | 33.0      | DHS micro-data |
| Western Africa | Senegal      | 2010-2011 | yes            | births            | unintended | 31.5      | DHS micro-data |
| Western Africa | Senegal      | 2012-2013 | yes            | births            | unintended | 30.0      | DHS micro-data |
| Western Africa | Senegal      | 2014-2014 | yes            | births            | unintended | 23.3      | DHS micro-data |
| Western Africa | Senegal      | 1992-1993 | yes            | unintended births | married    | 69.9-87.3 | DHS micro-data |
| Western Africa | Senegal      | 1997-1997 | yes            | unintended births | married    | 85.8-88.7 | DHS micro-data |
| Western Africa | Senegal      | 2005-2005 | yes            | unintended births | married    | 77.1-93.7 | DHS micro-data |
| Western Africa | Senegal      | 2010-2011 | yes            | unintended births | married    | 75.6-88.5 | DHS micro-data |
| Western Africa | Senegal      | 2012-2013 | yes            | unintended births | married    | 77.1-90.2 | DHS micro-data |
| Western Africa | Senegal      | 2014-2014 | yes            | unintended births | married    | 70.4-87.5 | DHS micro-data |
| Western Africa | Sierra Leone | 2008-2008 | yes            | births            | unintended | 31.2      | DHS micro-data |
| Western Africa | Sierra Leone | 2013-2013 | yes            | births            | unintended | 15.1      | DHS micro-data |
| Western Africa | Sierra Leone | 2008-2008 | yes            | unintended births | married    | 55.0-79.2 | DHS micro-data |
| Western Africa | Sierra Leone | 2013-2013 | yes            | unintended births | married    | 44.2-57.7 | DHS micro-data |
| Western Africa | Togo         | 1998-1998 | yes            | births            | unintended | 43.3      | DHS micro-data |
| Western Africa | Togo         | 2013-2014 | yes            | births            | unintended | 32.8      | DHS micro-data |
| Western Africa | Togo         | 1998-1998 | yes            | unintended births | married    | 64.1-83.8 | DHS micro-data |
| Western Africa | Togo         | 2013-2014 | yes            | unintended births | married    | 64.7-80.4 | DHS micro-data |
| Western Asia   | Armenia      | 2000-2000 | yes            | births            | unintended | 18.0      | DHS micro-data |
| Western Asia   | Armenia      | 2005-2005 | yes            | births            | unintended | 16.0      | DHS micro-data |
| Western Asia   | Armenia      | 2010-2010 | yes            | births            | unintended | 5.6       | DHS micro-data |
| Western Asia   | Armenia      | 2000-2000 | yes            | unintended births | married    | 92.1-99.0 | DHS micro-data |
| Western Asia   | Armenia      | 2005-2005 | yes            | unintended births | married    | 99.8-100  | DHS micro-data |
| Western Asia   | Armenia      | 2010-2010 | yes            | unintended births | married    | 85.0-100  | DHS micro-data |
| Western Asia   | Azerbaijan   | 2006-2006 | yes            | births            | unintended | 20.1      | DHS micro-data |
| Western Asia   | Azerbaijan   | 1997-2001 | yes            | births            | unintended | 14.4      | RHS report     |
| Western Asia   | Azerbaijan   | 2006-2006 | yes            | unintended births | married    | 93.9-93.9 | DHS micro-data |
| Western Asia   | Georgia      | 2001-2005 | yes            | births            | unintended | 4.9       | RHS report     |
| Western Asia   | Georgia      | 1995-2000 | yes            | births            | unintended | 5.8       | RHS report     |



Table 8: Data on the proportions of births and pregnancies unintended, as input into the model.

| UNPD Subregion | Country     | Years     | Representative | Event             | Measure    | Percent   | Reference              |
|----------------|-------------|-----------|----------------|-------------------|------------|-----------|------------------------|
| Western Asia   | Georgia     | 2006–2011 | yes            | births            | unintended | 5.9       | RHS report             |
| Western Asia   | Jordan      | 1990–1990 | no             | births            | unintended | 36.0      | DHS micro-data         |
| Western Asia   | Jordan      | 1997–1997 | no             | births            | unintended | 42.9      | DHS micro-data         |
| Western Asia   | Jordan      | 2002–2002 | no             | births            | unintended | 31.0      | DHS micro-data         |
| Western Asia   | Jordan      | 2007–2007 | no             | births            | unintended | 28.7      | DHS micro-data         |
| Western Asia   | Jordan      | 2012–2012 | no             | births            | unintended | 25.2      | DHS micro-data         |
| Western Asia   | Turkey      | 1993–1993 | no             | births            | unintended | 31.7      | DHS micro-data         |
| Western Asia   | Turkey      | 1998–1998 | no             | births            | unintended | 28.9      | DHS micro-data         |
| Western Asia   | Turkey      | 2003–2003 | no             | births            | unintended | 32.8      | DHS micro-data         |
| Western Asia   | Turkey      | 2008–2008 | yes            | births            | unintended | 28.2      | DHS micro-data         |
| Western Asia   | Turkey      | 2008–2008 | yes            | unintended births | married    | 95.5–97.5 | DHS micro-data         |
| Western Asia   | Yemen       | 2013–2013 | yes            | births            | unintended | 39.5      | DHS micro-data         |
| Western Asia   | Yemen       | 1993–1997 | yes            | births            | unintended | 45.1      | DHS report             |
| Western Asia   | Yemen       | 2013–2013 | yes            | unintended births | married    | 92.4–97.7 | DHS micro-data         |
| Western Europe | Belgium     | 2008–2010 | no             | births            | unintended | 10.0      | Lukasse et al. 2015    |
| Western Europe | France      | 1990–2010 | no             | pregnancies       | unintended | 29.4      | Moreau et al. 2014     |
| Western Europe | France      | 1990–1992 | yes            | births            | unintended | 20.0      | Toulemon 1997          |
| Western Europe | Germany     | 2010–2012 | yes            | births            | unintended | 21.5      | Fiala & Schweiger 2012 |
| Western Europe | Netherlands | 2007–2009 | yes            | pregnancies       | unintended | 18.1      | Bakker et al. 2009     |

## References for data obtained from sources other than the DHS or RHS programs

- Backhausen, Mette G., Maria Ekstrand, Tanja Tydén, Britta Kjeldberg Magnussen, Jill Shawe, Jenny Stern, and Hanne K. Hegaard. 2014. "Pregnancy Planning and Lifestyle prior to Conception and during Early Pregnancy among Danish Women." *The European Journal of Contraception & Reproductive Health Care: The Official Journal of the European Society of Contraception* 19 (1): 57–65. doi:10.3109/13625187.2013.851183.
- Bakker, Floor, Hanneke de Graaf, Stans de Haas, Harald Kedde, Hans Kruijer, and Ciel Wijzen. 2009. "Seksuele gezondheid in Nederland 2009." Utrecht: Rutgers Nisso Groep. [https://fiom.nl/sites/default/files/files/RNG\\_rapport-seksuele-gezondheid-in-nederland-2009.pdf](https://fiom.nl/sites/default/files/files/RNG_rapport-seksuele-gezondheid-in-nederland-2009.pdf).
- Branco, Maria João, Eleonora Paixão, and Lisa Ferreira Vicente. 2011. "Uma 'observação' sobre a utilização de cuidados preventivos pela mulher, 2011." Lisboa: Instituto Nacional de Saúde Doutor Ricardo Jorge. Departamento de Epidemiologia.
- Erfani, Amir. 2013. "Levels, Trends, and Determinants of Unintended Pregnancy in Iran: The Role of Contraceptive Failures." *Studies in Family Planning* 44 (3): 299–317. doi:10.1111/j.1728-4465.2013.00359.x.
- "Fertility and Family Survey, Italy." 2000. United Nations Economic Commission for Europe (UNECE).
- Fiala, Christian, and Petra Schweiger. 2012. "Österreichischer Verhütungsreport, 2012: Eine repräsentative Umfrage von Integral-Meinungsforschung im Auftrag des Gynmed Ambulatoriums." Vienna, Austria: Gynmed Ambulatorium, Wien.
- Font-Ribera, Laia, Glòria Pérez, Joaquín Salvador, and Carme Borrell. 2008. "Socioeconomic Inequalities in Unintended Pregnancy and Abortion Decision." *Journal of Urban Health: Bulletin of the New York Academy of Medicine* 85 (1): 125–35. doi:10.1007/s11524-007-9233-z.
- Han, Jung-Yeol, Alejandro A. Nava-Ocampo, and Gideon Koren. 2005. "Unintended Pregnancies and Exposure to Potential Human Teratogens." *Birth Defects Research. Part A, Clinical and Molecular Teratology* 73 (4): 245–48. doi:10.1002/bdra.20132.
- Iwasawa, Miho. 2011. "Fertility Regulation in Japan: Is a Non-Cohabiting Relationship an Alternative?" In , 1–24. Bad Herranalb, Germany.
- Lukasse, Mirjam, Made Laanpere, Helle Karro, Hildur Kristjansdottir, Anne-Mette Schroll, An-Sofie Van Parys, Anne-Marie Wangel, Berit Schei, and Bidens study group. 2015. "Pregnancy Intendedness and the Association with Physical, Sexual and Emotional Abuse - a European Multi-Country Cross-Sectional Study." *BMC Pregnancy and Childbirth* 15 (May): 120. doi:10.1186/s12884-015-0558-4.
- Melbourne Institute. 2005. "Household, Income and Labour Dynamics in Australia (HILDA) Survey, 2005." Australia: Melbourne Institute.

- . 2008. “Household, Income and Labour Dynamics in Australia (HILDA) Survey, 2008.” Australia: Melbourne Institute.
- Moreau, Caroline, Aline Bohet, Mireille Le Guen, Arnaud Régnier Loilier, Nathalie Bajos, and FECOND Group. 2014. “Unplanned or Unwanted? A Randomized Study of National Estimates of Pregnancy Intentions.” *Fertility and Sterility* 102 (6): 1663–70. doi:10.1016/j.fertnstert.2014.08.011.
- Rassi, Angela, Jeany Wattimena, and Kirsten Black. 2013. “Pregnancy Intention in an Urban Australian Antenatal Population.” *Australian and New Zealand Journal of Public Health* 37 (6): 568–73.
- Roshanaei, S., A. Shaghghi, M. A. Jafarabadi, and A. Kousha. 2015. “Measuring Unintended Pregnancies in Postpartum Iranian Women: Validation of the London Measure of Unplanned Pregnancy.” *Eastern Mediterranean Health Journal = La Revue De Sante De La Mediterranee Orientale = Al-Majallah Al-Sihhiyah Li-Sharq Al-Mutawassit* 21 (8): 572–78.
- Stern, Jenny, Lana Salih Joelsson, Tanja Tydén, Anna Berglund, Maria Ekstrand, Hanne Hegaard, Clara Aarts, Andreas Rosenblad, Margareta Larsson, and Per Kristiansson. 2016. “Is Pregnancy Planning Associated with Background Characteristics and Pregnancy-Planning Behavior?” *Acta Obstetrica Et Gynecologica Scandinavica* 95 (2): 182–89. doi:10.1111/aogs.12816.
- Tavares, Margarida, and Henrique Barros. 1996. “Gravidez não planeada em Portugal.” *Acta Medica Portuguesa* 10 (June): 351–56.
- Toulemon, Laurent. 1997. “Cohabitation Is Here to Stay.” *Population: An English Selection* 9: 11–46.
- Tydén, Tanja, Jenny Stern, Margaretha Nydahl, Anna Berglund, Margareta Larsson, Andreas Rosenblad, and Clara Aarts. 2011. “Pregnancy Planning in Sweden--a Pilot Study among 270 Women Attending Antenatal Clinics.” *Acta Obstetrica Et Gynecologica Scandinavica* 90 (4): 408–12. doi:10.1111/j.1600-0412.2010.01055.x.
- Wellings, Kaye, Kyle G. Jones, Catherine H. Mercer, Clare Tanton, Soazig Clifton, Jessica Datta, Andrew J. Copas, et al. 2013. “The Prevalence of Unplanned Pregnancy and Associated Factors in Britain: Findings from the Third National Survey of Sexual Attitudes and Lifestyles (Natsal-3).” *Lancet (London, England)* 382 (9907): 1807–16. doi:10.1016/S0140-6736(13)62071-1.

## 4 Appendix Tables

Appendix Table 1. Countries by UNPD subregions and subregions used in analysis

| UNPD subregion  | Country                               | Subregion for analysis                 |
|-----------------|---------------------------------------|----------------------------------------|
| Caribbean       | Antigua and Barbuda                   | Latin American Region                  |
| Caribbean       | Bahamas                               | Latin American Region                  |
| Caribbean       | Barbados                              | Latin American Region                  |
| Caribbean       | Cuba                                  | Latin American Region                  |
| Caribbean       | Dominican Republic                    | Latin American Region                  |
| Caribbean       | Grenada                               | Latin American Region                  |
| Caribbean       | Guadeloupe                            | Latin American Region                  |
| Caribbean       | Haiti                                 | Latin American Region                  |
| Caribbean       | Jamaica                               | Latin American Region                  |
| Caribbean       | Martinique                            | Latin American Region                  |
| Caribbean       | Puerto Rico                           | Latin American Region                  |
| Caribbean       | Saint Lucia                           | Latin American Region                  |
| Caribbean       | Saint Vincent and the Grenadines      | Latin American Region                  |
| Caribbean       | Trinidad and Tobago                   | Latin American Region                  |
| Caribbean       | United States Virgin Islands          | Latin American Region                  |
| Central America | Belize                                | Latin American Region                  |
| Central America | Costa Rica                            | Latin American Region                  |
| Central America | El Salvador                           | Latin American Region                  |
| Central America | Guatemala                             | Latin American Region                  |
| Central America | Honduras                              | Latin American Region                  |
| Central America | Mexico                                | Latin American Region                  |
| Central America | Nicaragua                             | Latin American Region                  |
| Central America | Panama                                | Latin American Region                  |
| Eastern Africa  | Burundi                               | East and Southern Africa               |
| Eastern Africa  | Comoros                               | East and Southern Africa               |
| Eastern Africa  | Djibouti                              | East and Southern Africa               |
| Eastern Africa  | Eritrea                               | East and Southern Africa               |
| Eastern Africa  | Ethiopia                              | East and Southern Africa               |
| Eastern Africa  | Kenya                                 | East and Southern Africa               |
| Eastern Africa  | Madagascar                            | East and Southern Africa               |
| Eastern Africa  | Malawi                                | East and Southern Africa               |
| Eastern Africa  | Mauritius                             | East and Southern Africa               |
| Eastern Africa  | Mozambique                            | East and Southern Africa               |
| Eastern Africa  | Reunion                               | East and Southern Africa               |
| Eastern Africa  | Rwanda                                | East and Southern Africa               |
| Eastern Africa  | Somalia                               | East and Southern Africa               |
| Eastern Africa  | South Sudan                           | East and Southern Africa               |
| Eastern Africa  | Tanzania                              | East and Southern Africa               |
| Eastern Africa  | Uganda                                | East and Southern Africa               |
| Eastern Africa  | Zambia                                | East and Southern Africa               |
| Eastern Africa  | Zimbabwe                              | East and Southern Africa               |
| Eastern Asia    | China                                 | East and Southeast Asia                |
| Eastern Asia    | China, Hong Kong SAR                  | East and Southeast Asia                |
| Eastern Asia    | Democratic People's Republic of Korea | East and Southeast Asia                |
| Eastern Asia    | Japan                                 | East and Southeast Asia                |
| Eastern Asia    | Mongolia                              | East and Southeast Asia                |
| Eastern Asia    | Republic of Korea                     | East and Southeast Asia                |
| Eastern Europe  | Belarus                               | Former Soviet Bloc                     |
| Eastern Europe  | Bulgaria                              | Former Soviet Bloc                     |
| Eastern Europe  | Czech Republic                        | Former Soviet Bloc                     |
| Eastern Europe  | Hungary                               | Former Soviet Bloc                     |
| Eastern Europe  | Poland                                | Former Soviet Bloc                     |
| Eastern Europe  | Republic of Moldova                   | Former Soviet Bloc                     |
| Eastern Europe  | Romania                               | Former Soviet Bloc                     |
| Eastern Europe  | Russian Federation                    | Former Soviet Bloc                     |
| Eastern Europe  | Slovakia                              | Former Soviet Bloc                     |
| Eastern Europe  | Ukraine                               | Former Soviet Bloc                     |
| Middle Africa   | Angola                                | West and Middle Africa                 |
| Middle Africa   | Cameroon                              | West and Middle Africa                 |
| Middle Africa   | Central African Republic              | West and Middle Africa                 |
| Middle Africa   | Chad                                  | West and Middle Africa                 |
| Middle Africa   | Congo                                 | West and Middle Africa                 |
| Middle Africa   | Congo                                 | West and Middle Africa                 |
| Middle Africa   | Equatorial Guinea                     | West and Middle Africa                 |
| Middle Africa   | Gabon                                 | West and Middle Africa                 |
| Middle Africa   | Sao Tome and Principe                 | West and Middle Africa                 |
| Northern Africa | Algeria                               | Eastern Mediterranean and North Africa |
| Northern Africa | Egypt                                 | Eastern Mediterranean and North Africa |
| Northern Africa | Libya                                 | Eastern Mediterranean and North Africa |
| Northern Africa | Morocco                               | Eastern Mediterranean and North Africa |
| Northern Africa | Sudan                                 | Eastern Mediterranean and North Africa |
| Northern Africa | Tunisia                               | Eastern Mediterranean and North Africa |

| UNPD subregion         | Country                     | Subregion for analysis                   |
|------------------------|-----------------------------|------------------------------------------|
| Northern America       | Canada                      | UnitedStates/Canada/Australia/NewZealand |
| Northern America       | United States               | UnitedStates/Canada/Australia/NewZealand |
| Northern Europe        | Denmark                     | Europe                                   |
| Northern Europe        | Estonia                     | Former Soviet Bloc                       |
| Northern Europe        | Finland                     | Europe                                   |
| Northern Europe        | Ireland                     | Europe                                   |
| Northern Europe        | Latvia                      | Former Soviet Bloc                       |
| Northern Europe        | Lithuania                   | Former Soviet Bloc                       |
| Northern Europe        | Norway                      | Europe                                   |
| Northern Europe        | Sweden                      | Europe                                   |
| Northern Europe        | United Kingdom              | Europe                                   |
| Oceania                | Australia                   | UnitedStates/Canada/Australia/NewZealand |
| Oceania                | Fiji                        | East and Southeast Asia                  |
| Oceania                | Guam                        | East and Southeast Asia                  |
| Oceania                | Kiribati                    | East and Southeast Asia                  |
| Oceania                | New Zealand                 | UnitedStates/Canada/Australia/NewZealand |
| Oceania                | Papua New Guinea            | East and Southeast Asia                  |
| Oceania                | Samoa                       | East and Southeast Asia                  |
| Oceania                | Solomon Islands             | East and Southeast Asia                  |
| Oceania                | Vanuatu                     | East and Southeast Asia                  |
| South America          | Argentina                   | Latin American Region                    |
| South America          | Bolivia                     | Latin American Region                    |
| South America          | Brazil                      | Latin American Region                    |
| South America          | Chile                       | Latin American Region                    |
| South America          | Colombia                    | Latin American Region                    |
| South America          | Ecuador                     | Latin American Region                    |
| South America          | Guyana                      | Latin American Region                    |
| South America          | Paraguay                    | Latin American Region                    |
| South America          | Peru                        | Latin American Region                    |
| South America          | Suriname                    | Latin American Region                    |
| South America          | Uruguay                     | Latin American Region                    |
| South America          | Venezuela (Bolivarian Repub | Latin American Region                    |
| South and central Asia | Afghanistan                 | South and Central Asia                   |
| South and central Asia | Bangladesh                  | South and Central Asia                   |
| South and central Asia | Bhutan                      | South and Central Asia                   |
| South and central Asia | India                       | South and Central Asia                   |
| South and central Asia | Iran                        | South and Central Asia                   |
| South and central Asia | Kazakhstan                  | South and Central Asia                   |
| South and central Asia | Kyrgyzstan                  | South and Central Asia                   |
| South and central Asia | Maldives                    | South and Central Asia                   |
| South and central Asia | Nepal                       | South and Central Asia                   |
| South and central Asia | Pakistan                    | South and Central Asia                   |
| South and central Asia | Sri Lanka                   | South and Central Asia                   |
| South and central Asia | Tajikistan                  | South and Central Asia                   |
| South and central Asia | Turkmenistan                | South and Central Asia                   |
| South and central Asia | Uzbekistan                  | South and Central Asia                   |
| South-Eastern Asia     | Cambodia                    | East and Southeast Asia                  |
| South-Eastern Asia     | Indonesia                   | East and Southeast Asia                  |
| South-Eastern Asia     | Lao People's Democratic Rep | East and Southeast Asia                  |
| South-Eastern Asia     | Malaysia                    | East and Southeast Asia                  |
| South-Eastern Asia     | Myanmar                     | East and Southeast Asia                  |
| South-Eastern Asia     | Philippines                 | East and Southeast Asia                  |
| South-Eastern Asia     | Singapore                   | East and Southeast Asia                  |
| South-Eastern Asia     | Thailand                    | East and Southeast Asia                  |
| South-Eastern Asia     | Timor-Leste                 | East and Southeast Asia                  |
| South-Eastern Asia     | Vietnam                     | East and Southeast Asia                  |
| Southern Africa        | Botswana                    | East and Southern Africa                 |
| Southern Africa        | Lesotho                     | East and Southern Africa                 |
| Southern Africa        | Namibia                     | East and Southern Africa                 |
| Southern Africa        | South Africa                | East and Southern Africa                 |
| Southern Africa        | Swaziland                   | East and Southern Africa                 |
| Southern Europe        | Albania                     | Former Soviet Bloc                       |
| Southern Europe        | Bosnia and Herzegovina      | Former Soviet Bloc                       |
| Southern Europe        | Croatia                     | Former Soviet Bloc                       |
| Southern Europe        | Greece                      | Europe                                   |
| Southern Europe        | Italy                       | Europe                                   |
| Southern Europe        | Malta                       | Europe                                   |
| Southern Europe        | Montenegro                  | Former Soviet Bloc                       |
| Southern Europe        | Portugal                    | Europe                                   |
| Southern Europe        | Serbia                      | Former Soviet Bloc                       |
| Southern Europe        | Slovenia                    | Former Soviet Bloc                       |
| Southern Europe        | Spain                       | Europe                                   |
| Southern Europe        | The former Yugoslav Republi | Former Soviet Bloc                       |
| Western Africa         | Benin                       | West and Middle Africa                   |

| UNPD subregion | Country              | Subregion for analysis                 |
|----------------|----------------------|----------------------------------------|
| Western Africa | Burkina Faso         | West and Middle Africa                 |
| Western Africa | Cabo Verde           | West and Middle Africa                 |
| Western Africa | Cote d'Ivoire        | West and Middle Africa                 |
| Western Africa | Gambia               | West and Middle Africa                 |
| Western Africa | Ghana                | West and Middle Africa                 |
| Western Africa | Guinea               | West and Middle Africa                 |
| Western Africa | Guinea-Bissau        | West and Middle Africa                 |
| Western Africa | Liberia              | West and Middle Africa                 |
| Western Africa | Mali                 | West and Middle Africa                 |
| Western Africa | Mauritania           | West and Middle Africa                 |
| Western Africa | Niger                | West and Middle Africa                 |
| Western Africa | Nigeria              | West and Middle Africa                 |
| Western Africa | Senegal              | West and Middle Africa                 |
| Western Africa | Sierra Leone         | West and Middle Africa                 |
| Western Africa | Togo                 | West and Middle Africa                 |
| Western Asia   | Armenia              | Former Soviet Bloc                     |
| Western Asia   | Azerbaijan           | Former Soviet Bloc                     |
| Western Asia   | Bahrain              | Eastern Mediterranean and North Africa |
| Western Asia   | Georgia              | Former Soviet Bloc                     |
| Western Asia   | Iraq                 | Eastern Mediterranean and North Africa |
| Western Asia   | Israel               | Eastern Mediterranean and North Africa |
| Western Asia   | Jordan               | Eastern Mediterranean and North Africa |
| Western Asia   | Kuwait               | Eastern Mediterranean and North Africa |
| Western Asia   | Lebanon              | Eastern Mediterranean and North Africa |
| Western Asia   | Oman                 | Eastern Mediterranean and North Africa |
| Western Asia   | Qatar                | Eastern Mediterranean and North Africa |
| Western Asia   | Saudi Arabia         | Eastern Mediterranean and North Africa |
| Western Asia   | State of Palestine   | Eastern Mediterranean and North Africa |
| Western Asia   | Syrian Arab Republic | Eastern Mediterranean and North Africa |
| Western Asia   | Turkey               | Eastern Mediterranean and North Africa |
| Western Asia   | United Arab Emirates | Eastern Mediterranean and North Africa |
| Western Asia   | Yemen                | Eastern Mediterranean and North Africa |
| Western Europe | Austria              | Europe                                 |
| Western Europe | Belgium              | Europe                                 |
| Western Europe | France               | Europe                                 |
| Western Europe | Germany              | Europe                                 |
| Western Europe | Netherlands          | Europe                                 |
| Western Europe | Switzerland          | Europe                                 |

Appendix Table 2. Estimated unintended pregnancies in millions, by geographic area and time period

|                           | 1990-1994 | 90% UI              | 1995-1999 | 90% UI              | 2000-2004 | 90% UI              | 2005-2009 | 90% UI              | 2010-2014 | 90% UI              | change | 90% UI         | % change | 90% UI           | prob. of change* |
|---------------------------|-----------|---------------------|-----------|---------------------|-----------|---------------------|-----------|---------------------|-----------|---------------------|--------|----------------|----------|------------------|------------------|
| World                     | 92.489    | (89.762 to 104.884) | 93.698    | (91.262 to 105.342) | 96.134    | (93.385 to 108.288) | 97.638    | (94.407 to 111.289) | 99.111    | (94.869 to 114.886) | 6.6    | (3.0 to 17.8)  | 7.2      | (3.0 to 18.9)    | 88.5             |
| Developing countries      | 76.057    | (73.020 to 86.597)  | 78.574    | (75.692 to 88.707)  | 82.303    | (79.157 to 93.184)  | 85.128    | (81.517 to 97.333)  | 88.044    | (83.564 to 102.831) | 12     | (1.4 to 23.6)  | 15.8     | (4.0 to 30.4)    | 98.8             |
| Developed countries       | 16.431    | (15.017 to 20.693)  | 15.121    | (14.016 to 18.604)  | 13.821    | (12.924 to 16.905)  | 12.492    | (11.707 to 15.234)  | 11.039    | (10.218 to 13.686)  | -5.4   | (-8.1 to -3.9) | -32.8    | (-41.3 to -24.5) | 100              |
| Excluding Eastern Europe  | 9.345     | (7.970 to 13.192)   | 9.077     | (7.994 to 12.230)   | 8.687     | (7.823 to 11.391)   | 8.251     | (7.487 to 10.765)   | 7.655     | (6.850 to 10.136)   | -1.7   | (-4.0 to -0.3) | -18.1    | (-33.2 to -3.7)  | 97.7             |
| Africa                    | 14.935    | (14.151 to 17.756)  | 16.724    | (15.859 to 19.546)  | 18.575    | (17.679 to 21.525)  | 20.27     | (19.390 to 23.367)  | 21.601    | (20.683 to 25.097)  | 6.7    | (5.3 to 8.6)   | 44.6     | (31.9 to 57.4)   | 100              |
| Eastern Africa            | 5.518     | (5.083 to 6.304)    | 6.277     | (5.862 to 7.017)    | 7.311     | (6.955 to 8.019)    | 8.255     | (7.898 to 8.957)    | 8.848     | (8.484 to 9.622)    | 3.3    | (2.7 to 4.0)   | 60.4     | (43.3 to 76.4)   | 100              |
| Middle Africa             | 1.831     | (1.557 to 2.413)    | 2.161     | (1.846 to 2.810)    | 2.506     | (2.168 to 3.226)    | 2.746     | (2.417 to 3.515)    | 2.987     | (2.596 to 3.900)    | 1.2    | (0.8 to 1.7)   | 63.1     | (39.1 to 93.1)   | 100              |
| Northern Africa           | 3.119     | (2.541 to 4.951)    | 3.091     | (2.469 to 5.003)    | 3         | (2.325 to 4.983)    | 3.202     | (2.423 to 5.420)    | 3.407     | (2.509 to 5.964)    | 0.3    | (-0.5 to 1.5)  | 9.2      | (-13.8 to 42.8)  | 75.2             |
| Southern Africa           | 1.093     | (0.895 to 1.524)    | 1.22      | (1.014 to 1.649)    | 1.273     | (1.051 to 1.735)    | 1.354     | (1.100 to 1.942)    | 1.396     | (1.101 to 1.972)    | 0.3    | (0.0 to 0.7)   | 27.7     | (3.5 to 57.9)    | 97.1             |
| Western Africa            | 3.383     | (3.096 to 3.968)    | 3.987     | (3.700 to 4.563)    | 4.499     | (4.182 to 5.130)    | 4.728     | (4.422 to 5.352)    | 4.98      | (4.672 to 5.670)    | 1.6    | (1.1 to 2.1)   | 47.2     | (29.9 to 65.6)   | 100              |
| Asia                      | 52.294    | (48.056 to 62.269)  | 51.978    | (48.421 to 63.226)  | 52.766    | (49.052 to 62.541)  | 52.969    | (48.699 to 64.142)  | 53.848    | (48.205 to 66.996)  | 1.6    | (-7.6 to 12.3) | 3        | (-11.0 to 23.8)  | 61.6             |
| Eastern Asia              | 18.588    | (16.052 to 24.362)  | 17.036    | (14.411 to 22.728)  | 16.155    | (13.096 to 22.330)  | 16.472    | (12.998 to 23.668)  | 16.368    | (12.283 to 24.062)  | -2.2   | (-4.2 to 4.3)  | -11.9    | (-38.2 to 23.5)  | 75.1             |
| Southern and central Asia | 21.286    | (18.066 to 26.426)  | 21.836    | (19.012 to 26.248)  | 23.372    | (20.851 to 27.177)  | 24.028    | (21.193 to 28.491)  | 25.157    | (21.401 to 32.007)  | 3.9    | (-2.1 to 11.0) | 18.2     | (-8.6 to 54.8)   | 86.5             |
| Southern Asia             | 20.433    | (17.205 to 25.505)  | 21.033    | (18.207 to 25.408)  | 22.602    | (20.100 to 26.353)  | 23.245    | (20.434 to 27.613)  | 24.316    | (20.631 to 31.059)  | 3.9    | (-2.0 to 10.9) | 19       | (-8.2 to 56.8)   | 86.8             |
| Central Asia              | 0.852     | (0.767 to 1.066)    | 0.801     | (0.748 to 0.928)    | 0.769     | (0.682 to 0.953)    | 0.78      | (0.650 to 1.013)    | 0.838     | (0.684 to 1.108)    | 0      | (-0.2 to 0.2)  | -1.6     | (-25.3 to 25.9)  | 52.5             |
| Southeastern Asia         | 9.228     | (7.765 to 12.982)   | 9.522     | (8.167 to 13.267)   | 9.553     | (8.120 to 13.464)   | 8.81      | (7.278 to 12.921)   | 8.6       | (6.969 to 13.204)   | -0.6   | (-2.6 to 1.8)  | -6.8     | (-24.8 to 19.0)  | 65.2             |
| Western Asia              | 3.283     | (2.875 to 4.284)    | 3.698     | (3.224 to 4.822)    | 3.811     | (3.345 to 5.018)    | 3.791     | (3.275 to 5.176)    | 3.865     | (3.232 to 5.544)    | 0.6    | (-0.0 to 1.7)  | 17.7     | (-1.3 to 47.2)   | 93.7             |
| Latin America             | 11.187    | (10.448 to 12.467)  | 12.011    | (11.186 to 13.488)  | 12.806    | (11.925 to 14.589)  | 13.43     | (12.377 to 15.760)  | 13.987    | (12.573 to 16.913)  | 2.8    | (1.1 to 5.5)   | 25       | (9.4 to 50.0)    | 99.7             |
| Caribbean                 | 0.971     | (0.852 to 1.283)    | 1.028     | (0.912 to 1.347)    | 1.09      | (0.958 to 1.427)    | 1.106     | (0.952 to 1.452)    | 1.098     | (0.928 to 1.479)    | 0.1    | (-0.1 to 0.3)  | 13       | (-6.4 to 33.4)   | 86.8             |
| Central America           | 2.5       | (2.132 to 3.085)    | 2.687     | (2.283 to 3.351)    | 2.916     | (2.473 to 3.696)    | 3.13      | (2.667 to 3.964)    | 3.298     | (2.690 to 4.307)    | 0.8    | (0.3 to 1.6)   | 31.9     | (10.3 to 62.4)   | 99.1             |
| South America             | 7.716     | (7.090 to 8.616)    | 8.296     | (7.540 to 9.411)    | 8.8       | (7.985 to 10.219)   | 9.194     | (8.075 to 11.201)   | 9.591     | (8.179 to 12.198)   | 1.9    | (0.3 to 4.4)   | 24.3     | (3.3 to 58.0)    | 96.9             |
| North America             | 3.294     | (2.474 to 4.445)    | 3.284     | (2.735 to 3.870)    | 3.501     | (3.165 to 3.910)    | 3.481     | (3.152 to 3.860)    | 3.243     | (2.762 to 3.722)    | -0.1   | (-1.2 to 0.9)  | -1.5     | (-29.6 to 34.1)  | 53.5             |
| Europe                    | 10.479    | (9.816 to 12.802)   | 9.367     | (8.800 to 11.391)   | 8.121     | (7.599 to 10.046)   | 7.102     | (6.650 to 8.702)    | 6.061     | (5.636 to 7.528)    | -4.4   | (-5.9 to -3.5) | -42.2    | (-48.7 to -34.0) | 100              |
| Eastern Europe            | 7.102     | (6.490 to 8.555)    | 6.06      | (5.593 to 7.402)    | 5.149     | (4.693 to 6.299)    | 4.255     | (3.903 to 5.087)    | 3.4       | (3.046 to 4.110)    | -3.7   | (-4.8 to -3.0) | -52.1    | (-58.6 to -44.7) | 100              |
| Northern Europe           | 0.639     | (0.558 to 0.837)    | 0.606     | (0.532 to 0.800)    | 0.554     | (0.490 to 0.740)    | 0.54      | (0.487 to 0.688)    | 0.533     | (0.487 to 0.658)    | -0.1   | (-0.3 to -0.0) | -16.6    | (-31.4 to -2.1)  | 96.7             |
| Southern Europe           | 1.675     | (1.306 to 3.040)    | 1.58      | (1.248 to 2.771)    | 1.374     | (1.081 to 2.444)    | 1.279     | (1.008 to 2.344)    | 1.164     | (0.892 to 2.154)    | -0.5   | (-1.3 to -0.1) | -30.5    | (-48.9 to -5.3)  | 97.5             |
| Western Europe            | 1.069     | (0.871 to 1.626)    | 1.126     | (0.915 to 1.625)    | 1.05      | (0.849 to 1.558)    | 1.034     | (0.844 to 1.544)    | 0.97      | (0.815 to 1.454)    | -0.1   | (-0.4 to 0.1)  | -9.2     | (-29.6 to 12.9)  | 76.3             |
| Oceania                   | 0.306     | (0.257 to 0.407)    | 0.336     | (0.287 to 0.439)    | 0.369     | (0.316 to 0.473)    | 0.381     | (0.327 to 0.485)    | 0.372     | (0.309 to 0.490)    | 0.1    | (-0.0 to 0.1)  | 21.7     | (-1.9 to 46.5)   | 93.5             |

\* Posterior probability of a change in the estimated direction



Appendix Table 3A. Percent of pregnancies unintended, by geographic area and time period

|                           | 1990-1994 | 90% UI     | 1995-1999 | 90% UI     | 2000-2004 | 90% UI     | 2005-2009 | 90% UI     | 2010-2014 | 90% UI     | change | 90% UI      | % change | 90% UI       | prob. of change* |
|---------------------------|-----------|------------|-----------|------------|-----------|------------|-----------|------------|-----------|------------|--------|-------------|----------|--------------|------------------|
| World                     | 43        | (42 to 47) | 45        | (44 to 48) | 46        | (45 to 50) | 45        | (44 to 49) | 44        | (42 to 48) | 1      | (-2 to 4)   | 3        | (-4 to 10)   | 71.7             |
| Developing countries      | 41        | (39 to 45) | 43        | (42 to 47) | 45        | (43 to 49) | 44        | (43 to 48) | 43        | (42 to 48) | 3      | (-1 to 6)   | 7        | (-1 to 15)   | 91.5             |
| Developed countries       | 54        | (51 to 62) | 56        | (53 to 62) | 54        | (52 to 61) | 50        | (48 to 56) | 46        | (43 to 52) | -8     | (-14 to -4) | -15      | (-24 to -7)  | 99.9             |
| Excluding Eastern Europe  | 49        | (43 to 59) | 50        | (46 to 59) | 50        | (46 to 57) | 47        | (44 to 55) | 45        | (41 to 52) | -4     | (-13 to 2)  | -9       | (-22 to 5)   | 86.9             |
| Africa                    | 40        | (38 to 44) | 41        | (39 to 45) | 41        | (40 to 45) | 41        | (39 to 44) | 39        | (38 to 43) | -1     | (-4 to 2)   | -2       | (-8 to 4)    | 71.8             |
| Eastern Africa            | 43        | (41 to 48) | 44        | (42 to 48) | 46        | (44 to 49) | 47        | (46 to 50) | 46        | (44 to 49) | 3      | (-1 to 6)   | 6        | (-3 to 15)   | 86.1             |
| Middle Africa             | 38        | (33 to 46) | 39        | (34 to 46) | 40        | (35 to 47) | 39        | (36 to 46) | 38        | (35 to 45) | 0      | (-5 to 6)   | 1        | (-12 to 17)  | 56.1             |
| Northern Africa           | 46        | (41 to 58) | 46        | (40 to 59) | 43        | (36 to 57) | 42        | (35 to 56) | 41        | (34 to 56) | -5     | (-12 to 3)  | -11      | (-25 to 6)   | 83.9             |
| Southern Africa           | 58        | (51 to 67) | 63        | (57 to 70) | 63        | (57 to 71) | 66        | (59 to 74) | 66        | (57 to 75) | 8      | (-1 to 17)  | 14       | (-1 to 31)   | 92.4             |
| Western Africa            | 30        | (28 to 34) | 32        | (30 to 35) | 32        | (30 to 35) | 30        | (28 to 33) | 28        | (26 to 31) | -2     | (-6 to 0)   | -8       | (-17 to 2)   | 92.1             |
| Asia                      | 39        | (37 to 45) | 42        | (40 to 47) | 43        | (41 to 49) | 43        | (40 to 48) | 42        | (39 to 48) | 2      | (-3 to 8)   | 6        | (-6 to 20)   | 79.7             |
| Eastern Asia              | 39        | (35 to 48) | 44        | (39 to 54) | 46        | (40 to 57) | 44        | (38 to 56) | 43        | (35 to 54) | 4      | (-6 to 13)  | 9        | (-15 to 34)  | 71.8             |
| Southern and central Asia | 36        | (31 to 43) | 37        | (33 to 43) | 39        | (36 to 45) | 40        | (36 to 45) | 40        | (36 to 47) | 4      | (-4 to 12)  | 10       | (-9 to 35)   | 79.1             |
| Southern Asia             | 36        | (31 to 43) | 37        | (33 to 43) | 39        | (35 to 45) | 40        | (36 to 45) | 40        | (36 to 47) | 4      | (-4 to 12)  | 10       | (-9 to 36)   | 79.6             |
| Central Asia              | 34        | (31 to 42) | 36        | (34 to 40) | 37        | (33 to 43) | 34        | (30 to 41) | 33        | (29 to 40) | -1     | (-8 to 6)   | -2       | (-22 to 17)  | 56.7             |
| Southeastern Asia         | 47        | (41 to 57) | 49        | (45 to 59) | 50        | (45 to 60) | 46        | (41 to 57) | 45        | (39 to 56) | -2     | (-9 to 6)   | -4       | (-18 to 12)  | 62.9             |
| Western Asia              | 46        | (41 to 54) | 49        | (44 to 58) | 49        | (44 to 57) | 47        | (43 to 56) | 46        | (40 to 57) | 0      | (-6 to 8)   | 1        | (-13 to 18)  | 57.4             |
| Latin America             | 59        | (55 to 64) | 61        | (58 to 66) | 64        | (61 to 69) | 67        | (63 to 72) | 69        | (64 to 75) | 10     | (5 to 17)   | 17       | (8 to 29)    | 99.9             |
| Caribbean                 | 63        | (59 to 71) | 67        | (63 to 74) | 72        | (67 to 78) | 73        | (68 to 79) | 73        | (68 to 80) | 10     | (3 to 15)   | 16       | (5 to 25)    | 99.2             |
| Central America           | 50        | (42 to 61) | 51        | (44 to 62) | 55        | (47 to 68) | 58        | (49 to 73) | 60        | (50 to 77) | 11     | (3 to 21)   | 21       | (5 to 42)    | 98.4             |
| South America             | 62        | (58 to 67) | 65        | (61 to 69) | 67        | (64 to 71) | 70        | (66 to 75) | 72        | (67 to 79) | 10     | (3 to 18)   | 16       | (5 to 29)    | 99.4             |
| North America             | 46        | (35 to 63) | 48        | (40 to 57) | 51        | (46 to 57) | 50        | (46 to 56) | 48        | (40 to 54) | 1      | (-16 to 14) | 2        | (-27 to 39)  | 54.1             |
| Europe                    | 54        | (53 to 60) | 56        | (54 to 61) | 53        | (50 to 60) | 47        | (45 to 53) | 43        | (40 to 49) | -12    | (-16 to -8) | -22      | (-28 to -14) | 100              |
| Eastern Europe            | 64        | (61 to 69) | 66        | (64 to 71) | 65        | (62 to 73) | 57        | (54 to 62) | 50        | (46 to 56) | -14    | (-19 to -9) | -22      | (-29 to -15) | 100              |
| Northern Europe           | 33        | (29 to 43) | 34        | (30 to 44) | 32        | (29 to 43) | 30        | (27 to 38) | 29        | (27 to 36) | -4     | (-11 to 1)  | -12      | (-27 to 2)   | 91.9             |
| Southern Europe           | 53        | (47 to 68) | 54        | (48 to 68) | 50        | (43 to 65) | 47        | (40 to 64) | 44        | (37 to 61) | -9     | (-18 to 1)  | -17      | (-31 to 2)   | 93.3             |
| Western Europe            | 35        | (30 to 46) | 38        | (32 to 49) | 35        | (29 to 46) | 35        | (29 to 46) | 33        | (29 to 43) | -2     | (-10 to 4)  | -6       | (-24 to 13)  | 71.1             |
| Oceania                   | 40        | (34 to 52) | 42        | (36 to 53) | 45        | (39 to 55) | 43        | (38 to 53) | 41        | (34 to 51) | 1      | (-8 to 7)   | 1        | (-18 to 20)  | 51.9             |

\* Posterior probability of a change in the estimated direction

Appendix Table 3B. Percent of births unintended, by geographic area and time period

|                           | 1990-1994 | 90% UI     | 1995-1999 | 90% UI     | 2000-2004 | 90% UI     | 2005-2009 | 90% UI     | 2010-2014 | 90% UI     | change | 90% UI      | % change | 90% UI       | prob. of change* |
|---------------------------|-----------|------------|-----------|------------|-----------|------------|-----------|------------|-----------|------------|--------|-------------|----------|--------------|------------------|
| World                     | 23        | (21 to 27) | 26        | (24 to 29) | 27        | (25 to 30) | 26        | (24 to 29) | 23        | (22 to 26) | 0      | (-3 to 3)   | -1       | (-13 to 12)  | 56.8             |
| Developing countries      | 24        | (22 to 28) | 26        | (24 to 29) | 27        | (25 to 30) | 26        | (24 to 29) | 23        | (22 to 27) | 0      | (-4 to 3)   | -2       | (-14 to 12)  | 60.9             |
| Developed countries       | 21        | (16 to 29) | 25        | (21 to 30) | 27        | (24 to 34) | 25        | (23 to 30) | 23        | (20 to 28) | 3      | (-6 to 9)   | 12       | (-22 to 53)  | 65.7             |
| Excluding Eastern Europe  | 24        | (18 to 35) | 28        | (24 to 35) | 30        | (26 to 36) | 28        | (25 to 34) | 26        | (22 to 32) | 2      | (-9 to 11)  | 8        | (-28 to 57)  | 59.3             |
| Africa                    | 31        | (29 to 33) | 31        | (29 to 33) | 30        | (29 to 32) | 30        | (29 to 32) | 27        | (26 to 29) | -3     | (-5 to -1)  | -11      | (-17 to -4)  | 99.5             |
| Eastern Africa            | 36        | (32 to 39) | 36        | (33 to 39) | 37        | (35 to 40) | 39        | (37 to 41) | 37        | (35 to 39) | 1      | (-3 to 5)   | 3        | (-8 to 14)   | 65.7             |
| Middle Africa             | 30        | (25 to 36) | 31        | (26 to 36) | 31        | (27 to 36) | 30        | (27 to 34) | 28        | (25 to 32) | -2     | (-7 to 3)   | -6       | (-21 to 13)  | 71.8             |
| Northern Africa           | 32        | (28 to 38) | 30        | (24 to 37) | 25        | (20 to 31) | 22        | (18 to 30) | 21        | (16 to 29) | -11    | (-17 to -3) | -33      | (-49 to -10) | 99               |
| Southern Africa           | 48        | (42 to 55) | 53        | (48 to 57) | 51        | (46 to 56) | 55        | (48 to 63) | 54        | (45 to 64) | 6      | (-5 to 17)  | 12       | (-9 to 36)   | 80.1             |
| Western Africa            | 22        | (20 to 24) | 23        | (21 to 25) | 22        | (20 to 24) | 20        | (19 to 22) | 17        | (15 to 19) | -5     | (-7 to -2)  | -22      | (-32 to -11) | 99.9             |
| Asia                      | 19        | (15 to 24) | 21        | (18 to 26) | 22        | (19 to 27) | 20        | (18 to 25) | 17        | (14 to 22) | -2     | (-6 to 3)   | -8       | (-29 to 20)  | 71.8             |
| Eastern Asia              | 8         | (3 to 19)  | 11        | (6 to 23)  | 12        | (7 to 27)  | 11        | (5 to 25)  | 10        | (5 to 22)  | 2      | (-7 to 12)  | 27       | (-50 to 221) | 67.4             |
| Southern and central Asia | 22        | (17 to 29) | 22        | (18 to 28) | 23        | (19 to 29) | 22        | (19 to 25) | 18        | (14 to 23) | -4     | (-12 to 2)  | -20      | (-43 to 14)  | 85.9             |
| Southern Asia             | 22        | (17 to 30) | 23        | (18 to 29) | 24        | (19 to 30) | 22        | (19 to 26) | 18        | (14 to 23) | -4     | (-12 to 3)  | -20      | (-43 to 14)  | 85.3             |
| Central Asia              | 9         | (5 to 18)  | 10        | (8 to 13)  | 10        | (7 to 15)  | 9         | (5 to 14)  | 6         | (4 to 11)  | -3     | (-12 to 2)  | -31      | (-69 to 35)  | 80.7             |
| Southeastern Asia         | 26        | (21 to 34) | 29        | (24 to 36) | 30        | (26 to 37) | 25        | (20 to 33) | 22        | (18 to 28) | -4     | (-12 to 3)  | -15      | (-37 to 15)  | 81.6             |
| Western Asia              | 31        | (25 to 38) | 34        | (27 to 41) | 32        | (26 to 39) | 31        | (25 to 38) | 29        | (22 to 37) | -2     | (-10 to 6)  | -7       | (-29 to 22)  | 67.9             |
| Latin America             | 45        | (40 to 51) | 47        | (43 to 52) | 49        | (45 to 55) | 51        | (45 to 57) | 53        | (46 to 61) | 7      | (0 to 16)   | 17       | (0 to 36)    | 95.5             |
| Caribbean                 | 43        | (38 to 52) | 48        | (42 to 56) | 54        | (48 to 62) | 54        | (48 to 61) | 55        | (48 to 62) | 11     | (2 to 19)   | 26       | (5 to 47)    | 97.7             |
| Central America           | 40        | (31 to 53) | 40        | (31 to 54) | 43        | (33 to 60) | 45        | (33 to 64) | 46        | (33 to 68) | 6      | (-4 to 20)  | 16       | (-9 to 48)   | 85.5             |
| South America             | 48        | (42 to 53) | 50        | (45 to 54) | 52        | (47 to 56) | 53        | (48 to 59) | 55        | (48 to 64) | 8      | (-1 to 17)  | 16       | (-1 to 38)   | 93.3             |
| North America             | 29        | (13 to 50) | 32        | (22 to 44) | 38        | (31 to 45) | 37        | (31 to 44) | 35        | (27 to 44) | 7      | (-16 to 24) | 23       | (-34 to 167) | 70.9             |
| Europe                    | 15        | (12 to 21) | 17        | (14 to 23) | 18        | (14 to 27) | 16        | (13 to 22) | 15        | (12 to 20) | 0      | (-6 to 5)   | 0        | (-32 to 39)  | 54.4             |
| Eastern Europe            | 11        | (7 to 19)  | 12        | (8 to 18)  | 19        | (12 to 35) | 15        | (11 to 21) | 14        | (9 to 20)  | 3      | (-7 to 10)  | 27       | (-38 to 121) | 68.8             |
| Northern Europe           | 12        | (7 to 24)  | 13        | (8 to 26)  | 12        | (7 to 24)  | 10        | (6 to 19)  | 11        | (8 to 18)  | -1     | (-10 to 5)  | -8       | (-48 to 60)  | 59               |
| Southern Europe           | 21        | (16 to 28) | 24        | (18 to 34) | 22        | (15 to 32) | 22        | (15 to 34) | 19        | (13 to 31) | -2     | (-11 to 10) | -9       | (-43 to 54)  | 63.2             |
| Western Europe            | 19        | (14 to 28) | 23        | (16 to 32) | 18        | (12 to 27) | 17        | (12 to 25) | 16        | (13 to 21) | -4     | (-12 to 4)  | -19      | (-47 to 23)  | 79.1             |
| Oceania                   | 27        | (20 to 40) | 29        | (22 to 40) | 32        | (24 to 42) | 31        | (24 to 41) | 29        | (21 to 38) | 1      | (-9 to 9)   | 5        | (-26 to 41)  | 55.8             |

\* Posterior probability of a change in the estimated direction

Appendix Table 4. Estimated unintended birth rates per 1,000 women 15-44 years old, by geographic area and time period

|                           | 1990-1994 | 90% UI     | 1995-1999 | 90% UI     | 2000-2004 | 90% UI     | 2005-2009 | 90% UI     | 2010-2014 | 90% UI     | change | 90% UI       | % change | 90% UI       | prob. of change* |
|---------------------------|-----------|------------|-----------|------------|-----------|------------|-----------|------------|-----------|------------|--------|--------------|----------|--------------|------------------|
| World                     | 25        | (23 to 29) | 25        | (23 to 28) | 24        | (23 to 27) | 22        | (21 to 25) | 20        | (19 to 23) | -5     | (-9 to -3)   | -21      | (-31 to -11) | 99.8             |
| Developing countries      | 29        | (26 to 34) | 28        | (26 to 31) | 26        | (25 to 30) | 24        | (23 to 27) | 21        | (20 to 24) | -8     | (-12 to -4)  | -27      | (-36 to -16) | 100              |
| Developed countries       | 12        | (9 to 17)  | 13        | (11 to 16) | 14        | (12 to 18) | 14        | (12 to 17) | 13        | (11 to 16) | 2      | (-4 to 5)    | 13       | (-22 to 55)  | 67.4             |
| Excluding Eastern Europe  | 14        | (10 to 20) | 16        | (13 to 20) | 16        | (14 to 20) | 16        | (14 to 20) | 15        | (13 to 19) | 2      | (-5 to 6)    | 11       | (-26 to 61)  | 64.3             |
| Africa                    | 59        | (56 to 63) | 56        | (53 to 59) | 52        | (50 to 55) | 50        | (48 to 52) | 43        | (41 to 46) | -15    | (-19 to -12) | -26      | (-31 to -21) | 100              |
| Eastern Africa            | 76        | (70 to 85) | 74        | (69 to 80) | 74        | (70 to 78) | 73        | (69 to 77) | 63        | (59 to 67) | -14    | (-22 to -6)  | -18      | (-27 to -9)  | 100              |
| Middle Africa             | 69        | (57 to 82) | 69        | (58 to 81) | 67        | (58 to 78) | 62        | (56 to 70) | 54        | (48 to 61) | -15    | (-28 to -4)  | -22      | (-35 to -6)  | 98.5             |
| Northern Africa           | 45        | (39 to 53) | 35        | (28 to 43) | 26        | (21 to 32) | 23        | (18 to 30) | 22        | (16 to 30) | -23    | (-30 to -15) | -52      | (-63 to -34) | 100              |
| Southern Africa           | 59        | (51 to 68) | 56        | (51 to 61) | 51        | (46 to 56) | 51        | (44 to 59) | 47        | (39 to 56) | -12    | (-23 to -9)  | -20      | (-35 to -3)  | 96.7             |
| Western Africa            | 47        | (42 to 52) | 47        | (43 to 50) | 44        | (41 to 49) | 39        | (36 to 43) | 32        | (29 to 35) | -15    | (-20 to -9)  | -32      | (-40 to -22) | 100              |
| Asia                      | 20        | (17 to 26) | 19        | (17 to 24) | 18        | (16 to 23) | 16        | (14 to 19) | 13        | (11 to 17) | -7     | (-12 to -3)  | -36      | (-50 to -16) | 99.5             |
| Eastern Asia              | 6         | (3 to 14)  | 6         | (3 to 14)  | 6         | (3 to 14)  | 6         | (3 to 13)  | 6         | (3 to 13)  | 0      | (-7 to 5)    | -7       | (-44 to 136) | 54.4             |
| Southern and central Asia | 31        | (24 to 42) | 28        | (22 to 35) | 26        | (20 to 32) | 21        | (18 to 25) | 16        | (12 to 21) | -15    | (-25 to -7)  | -49      | (-64 to -28) | 99.9             |
| Central Asia              | 32        | (24 to 43) | 29        | (23 to 36) | 26        | (21 to 33) | 22        | (19 to 25) | 16        | (13 to 21) | -16    | (-26 to -7)  | -49      | (-64 to -28) | 99.9             |
| Southeastern Asia         | 12        | (7 to 23)  | 10        | (8 to 14)  | 9         | (6 to 13)  | 8         | (5 to 12)  | 6         | (3 to 10)  | -6     | (-17 to -0)  | -50      | (-77 to -2)  | 95.4             |
| Western Asia              | 28        | (22 to 37) | 27        | (23 to 33) | 26        | (22 to 31) | 20        | (17 to 27) | 17        | (14 to 22) | -11    | (-20 to -4)  | -40      | (-55 to -18) | 99.6             |
| Latin America             | 49        | (44 to 55) | 46        | (42 to 51) | 44        | (40 to 49) | 41        | (37 to 46) | 40        | (34 to 46) | -9     | (-15 to -3)  | -19      | (-30 to -6)  | 98.7             |
| Caribbean                 | 44        | (39 to 53) | 44        | (39 to 52) | 47        | (42 to 53) | 44        | (39 to 50) | 42        | (37 to 48) | -2     | (-10 to 5)   | -5       | (-21 to 11)  | 71.1             |
| Central America           | 51        | (39 to 67) | 46        | (36 to 61) | 44        | (34 to 61) | 41        | (31 to 59) | 39        | (28 to 57) | -12    | (-21 to -1)  | -23      | (-39 to -2)  | 95.9             |
| South America             | 49        | (43 to 55) | 46        | (42 to 50) | 44        | (40 to 47) | 40        | (36 to 45) | 40        | (34 to 46) | -9     | (-16 to -2)  | -19      | (-31 to -4)  | 97.5             |
| North America             | 19        | (9 to 34)  | 21        | (14 to 28) | 24        | (20 to 29) | 25        | (21 to 30) | 24        | (18 to 29) | 4      | (-11 to 16)  | 22       | (-35 to 165) | 70.2             |
| Europe                    | 8         | (6 to 11)  | 8         | (7 to 11)  | 9         | (7 to 13)  | 8         | (7 to 11)  | 8         | (7 to 11)  | 0      | (-3 to 3)    | 0        | (-31 to 40)  | 52.8             |
| Eastern Europe            | 6         | (4 to 11)  | 5         | (3 to 8)   | 8         | (5 to 15)  | 7         | (5 to 10)  | 7         | (5 to 10)  | 1      | (-4 to 5)    | 23       | (-41 to 113) | 65.5             |
| Northern Europe           | 7         | (4 to 15)  | 8         | (5 to 15)  | 7         | (4 to 13)  | 6         | (4 to 11)  | 7         | (5 to 11)  | -1     | (-6 to 3)    | -9       | (-49 to 59)  | 59.9             |
| Southern Europe           | 10        | (8 to 14)  | 11        | (8 to 16)  | 10        | (7 to 15)  | 11        | (7 to 17)  | 10        | (7 to 16)  | 0      | (-5 to 6)    | -3       | (-39 to 63)  | 55.8             |
| Western Europe            | 10        | (8 to 15)  | 12        | (9 to 17)  | 9         | (6 to 14)  | 9         | (7 to 13)  | 9         | (7 to 12)  | -2     | (-6 to 2)    | -15      | (-44 to 30)  | 72.8             |
| Oceania                   | 23        | (17 to 33) | 24        | (18 to 33) | 26        | (20 to 35) | 26        | (20 to 34) | 23        | (17 to 31) | 0      | (-9 to 7)    | 2        | (-28 to 37)  | 50               |

\* Posterior probability of a change in the estimated direction

Appendix Table 5. Estimated intended birth rates per 1,000 women 15-44 years old, by geographic area and time period

|                           | 1990-1994 | 90% UI       | 1995-1999 | 90% UI       | 2000-2004 | 90% UI       | 2005-2009 | 90% UI       | 2010-2014 | 90% UI       | change | 90% UI       | % change | 90% UI       | prob. of change* |
|---------------------------|-----------|--------------|-----------|--------------|-----------|--------------|-----------|--------------|-----------|--------------|--------|--------------|----------|--------------|------------------|
| World                     | 83        | (79 to 85)   | 72        | (69 to 73)   | 66        | (63 to 67)   | 65        | (62 to 66)   | 66        | (64 to 68)   | -17    | (-20 to -14) | -20      | (-23 to -17) | 100              |
| Developing countries      | 93        | (88 to 96)   | 79        | (76 to 81)   | 72        | (68 to 73)   | 69        | (66 to 71)   | 70        | (67 to 72)   | -23    | (-26 to -19) | -24      | (-28 to -21) | 100              |
| Developed countries       | 45        | (40 to 48)   | 39        | (36 to 41)   | 38        | (35 to 40)   | 41        | (39 to 43)   | 44        | (41 to 46)   | -1     | (-5 to 4)    | -2       | (-10 to 10)  | 59.4             |
| Excluding Eastern Europe  | 44        | (37 to 48)   | 40        | (36 to 43)   | 39        | (36 to 42)   | 41        | (38 to 43)   | 44        | (40 to 46)   | 0      | (-5 to 6)    | 0        | (-11 to 17)  | 52.5             |
| Africa                    | 134       | (130 to 137) | 125       | (121 to 128) | 120       | (117 to 122) | 116       | (113 to 118) | 116       | (113 to 118) | -18    | (-22 to -14) | -14      | (-16 to -11) | 100              |
| Eastern Africa            | 139       | (130 to 145) | 132       | (126 to 138) | 124       | (119 to 127) | 113       | (109 to 117) | 109       | (105 to 112) | -30    | (-37 to -21) | -21      | (-26 to -16) | 100              |
| Middle Africa             | 162       | (149 to 174) | 157       | (145 to 168) | 151       | (140 to 160) | 144       | (137 to 151) | 138       | (131 to 144) | -24    | (-36 to -11) | -15      | (-21 to -8)  | 99.9             |
| Northern Africa           | 95        | (87 to 102)  | 82        | (74 to 88)   | 78        | (71 to 83)   | 79        | (72 to 84)   | 80        | (72 to 86)   | -15    | (-23 to -8)  | -16      | (-24 to -9)  | 100              |
| Southern Africa           | 64        | (55 to 72)   | 51        | (46 to 56)   | 49        | (44 to 54)   | 42        | (35 to 49)   | 41        | (32 to 49)   | -24    | (-34 to -13) | -37      | (-51 to -22) | 100              |
| Western Africa            | 167       | (162 to 171) | 158       | (154 to 162) | 154       | (150 to 158) | 154       | (150 to 157) | 156       | (153 to 159) | -11    | (-16 to -6)  | -7       | (-10 to -3)  | 99.9             |
| Asia                      | 88        | (82 to 92)   | 73        | (68 to 75)   | 64        | (60 to 67)   | 62        | (58 to 64)   | 63        | (60 to 65)   | -25    | (-29 to -20) | -28      | (-32 to -24) | 100              |
| Eastern Asia              | 71        | (62 to 74)   | 51        | (44 to 54)   | 44        | (37 to 47)   | 46        | (38 to 49)   | 51        | (44 to 54)   | -20    | (-26 to -13) | -28      | (-36 to -21) | 100              |
| Southern and central Asia | 112       | (101 to 119) | 97        | (90 to 103)  | 85        | (78 to 90)   | 77        | (73 to 80)   | 74        | (70 to 78)   | -37    | (-46 to -27) | -33      | (-39 to -27) | 100              |
| Southern Asia             | 112       | (101 to 119) | 98        | (90 to 104)  | 85        | (78 to 90)   | 77        | (73 to 80)   | 74        | (69 to 78)   | -38    | (-46 to -27) | -34      | (-39 to -27) | 100              |
| Central Asia              | 116       | (105 to 122) | 93        | (90 to 95)   | 80        | (76 to 84)   | 83        | (79 to 86)   | 87        | (83 to 90)   | -29    | (-35 to -19) | -25      | (-29 to -17) | 99.9             |
| Southeastern Asia         | 80        | (71 to 86)   | 66        | (60 to 70)   | 59        | (53 to 63)   | 61        | (54 to 64)   | 60        | (55 to 63)   | -20    | (-27 to -12) | -25      | (-32 to -16) | 100              |
| Western Asia              | 96        | (86 to 104)  | 82        | (73 to 90)   | 76        | (67 to 83)   | 71        | (63 to 76)   | 68        | (60 to 74)   | -28    | (-37 to -19) | -29      | (-37 to -21) | 100              |
| Latin America             | 60        | (53 to 65)   | 52        | (47 to 56)   | 45        | (40 to 49)   | 40        | (34 to 44)   | 36        | (29 to 41)   | -24    | (-31 to -18) | -40      | (-50 to -31) | 100              |
| Caribbean                 | 58        | (50 to 64)   | 49        | (41 to 54)   | 40        | (33 to 44)   | 37        | (31 to 42)   | 35        | (30 to 41)   | -23    | (-29 to -14) | -39      | (-49 to -27) | 100              |
| Central America           | 76        | (60 to 87)   | 68        | (53 to 78)   | 58        | (41 to 68)   | 51        | (33 to 62)   | 45        | (27 to 56)   | -31    | (-42 to -21) | -41      | (-58 to -30) | 100              |
| South America             | 54        | (48 to 59)   | 47        | (43 to 51)   | 41        | (37 to 45)   | 36        | (32 to 40)   | 32        | (25 to 37)   | -22    | (-29 to -15) | -41      | (-52 to -29) | 100              |
| North America             | 48        | (33 to 58)   | 44        | (36 to 50)   | 40        | (36 to 45)   | 42        | (37 to 46)   | 43        | (37 to 49)   | -5     | (-16 to 10)  | -10      | (-29 to 30)  | 72.2             |
| Europe                    | 46        | (43 to 48)   | 39        | (37 to 41)   | 39        | (35 to 41)   | 43        | (40 to 44)   | 46        | (44 to 48)   | 0      | (-2 to 4)    | 1        | (-5 to 9)    | 62.3             |
| Eastern Europe            | 49        | (44 to 51)   | 38        | (35 to 39)   | 34        | (27 to 37)   | 41        | (38 to 43)   | 45        | (42 to 48)   | -3     | (-7 to 2)    | -7       | (-14 to 4)   | 86.3             |
| Northern Europe           | 55        | (47 to 58)   | 51        | (43 to 54)   | 49        | (42 to 52)   | 53        | (48 to 55)   | 55        | (50 to 57)   | 0      | (-3 to 6)    | 0        | (-6 to 12)   | 52               |
| Southern Europe           | 39        | (35 to 41)   | 35        | (31 to 38)   | 37        | (32 to 40)   | 39        | (32 to 42)   | 42        | (36 to 45)   | 3      | (-3 to 8)    | 8        | (-7 to 22)   | 83.3             |
| Western Europe            | 43        | (38 to 46)   | 41        | (36 to 44)   | 43        | (39 to 46)   | 44        | (40 to 47)   | 47        | (44 to 49)   | 4      | (0 to 9)     | 10       | (1 to 24)    | 96.3             |
| Oceania                   | 60        | (50 to 67)   | 59        | (49 to 64)   | 56        | (47 to 62)   | 57        | (49 to 63)   | 58        | (50 to 64)   | -3     | (-9 to 6)    | -4       | (-15 to 12)  | 67.6             |

\* Posterior probability of a change in the estimated direction

Appendix Table 6. Estimated abortion rates per 1,000 women 15-44 years old, by geographic area and time period

|                           | 1990-1994 | 90% UI      | 1995-1999 | 90% UI     | 2000-2004 | 90% UI     | 2005-2009 | 90% UI     | 2010-2014 | 90% UI     | change | 90% UI       | prob. of change* |
|---------------------------|-----------|-------------|-----------|------------|-----------|------------|-----------|------------|-----------|------------|--------|--------------|------------------|
| World                     | 40        | (39 to 48)  | 37        | (35 to 43) | 34        | (33 to 41) | 34        | (32 to 41) | 35        | (32 to 43) | -5     | (-11 to -0)  | 95.4             |
| Developing countries      | 39        | (37 to 47)  | 36        | (34 to 43) | 35        | (32 to 41) | 34        | (32 to 42) | 36        | (33 to 45) | -3     | (-9 to 4)    | 74.8             |
| Developed countries       | 46        | (41 to 59)  | 40        | (36 to 51) | 34        | (31 to 44) | 30        | (28 to 40) | 27        | (24 to 36) | -19    | (-26 to -15) | 100              |
| Excluding Eastern Europe  | 30        | (25 to 47)  | 27        | (22 to 41) | 25        | (21 to 37) | 23        | (19 to 34) | 22        | (18 to 33) | -9     | (-17 to -4)  | 99.9             |
| Africa                    | 33        | (28 to 50)  | 33        | (29 to 48) | 34        | (30 to 47) | 33        | (29 to 45) | 34        | (31 to 46) | 1      | (-8 to 7)    | 50.9             |
| Eastern Africa            | 33        | (26 to 46)  | 33        | (28 to 44) | 34        | (30 to 44) | 32        | (29 to 40) | 34        | (31 to 41) | 1      | (-9 to 8)    | 54.4             |
| Middle Africa             | 32        | (21 to 62)  | 34        | (22 to 64) | 35        | (24 to 64) | 33        | (23 to 60) | 35        | (24 to 62) | 3      | (-10 to 14)  | 64.5             |
| Northern Africa           | 41        | (25 to 92)  | 39        | (24 to 84) | 37        | (23 to 79) | 38        | (23 to 79) | 38        | (23 to 82) | -3     | (-25 to 13)  | 66.6             |
| Southern Africa           | 32        | (17 to 68)  | 33        | (18 to 65) | 34        | (19 to 66) | 33        | (18 to 64) | 34        | (19 to 69) | 2      | (-16 to 19)  | 59               |
| Western Africa            | 28        | (23 to 41)  | 29        | (25 to 40) | 30        | (26 to 39) | 29        | (25 to 37) | 31        | (28 to 39) | 3      | (-7 to 9)    | 68.3             |
| Asia                      | 41        | (37 to 50)  | 37        | (33 to 45) | 34        | (31 to 42) | 34        | (30 to 43) | 36        | (31 to 46) | -5     | (-13 to 4)   | 82.8             |
| Eastern Asia              | 43        | (38 to 56)  | 38        | (32 to 49) | 34        | (27 to 47) | 34        | (26 to 48) | 36        | (26 to 53) | -8     | (-22 to 7)   | 83.3             |
| Southern and central Asia | 35        | (28 to 48)  | 33        | (27 to 42) | 32        | (28 to 38) | 33        | (27 to 42) | 37        | (30 to 50) | 1      | (-11 to 15)  | 56.6             |
| Southern Asia             | 35        | (27 to 47)  | 32        | (26 to 41) | 32        | (28 to 38) | 33        | (27 to 42) | 37        | (29 to 50) | 2      | (-11 to 16)  | 59.1             |
| Central Asia              | 54        | (49 to 63)  | 47        | (44 to 55) | 41        | (36 to 52) | 39        | (32 to 52) | 42        | (33 to 56) | -12    | (-22 to -0)  | 95.3             |
| Southeastern Asia         | 46        | (35 to 74)  | 42        | (32 to 67) | 37        | (28 to 62) | 35        | (26 to 60) | 35        | (25 to 62) | -11    | (-25 to 1)   | 93.1             |
| Western Asia              | 42        | (33 to 65)  | 42        | (34 to 66) | 41        | (33 to 63) | 35        | (28 to 59) | 34        | (25 to 59) | -8     | (-18 to 4)   | 87.2             |
| Latin America             | 40        | (37 to 47)  | 40        | (36 to 50) | 41        | (36 to 52) | 43        | (37 to 57) | 44        | (36 to 61) | 4      | (-6 to 19)   | 74.9             |
| Caribbean                 | 60        | (48 to 94)  | 60        | (49 to 92) | 59        | (46 to 92) | 60        | (46 to 93) | 59        | (44 to 95) | -1     | (-19 to 17)  | 53.5             |
| Central America           | 27        | (23 to 34)  | 28        | (23 to 37) | 29        | (24 to 38) | 32        | (29 to 38) | 33        | (25 to 45) | 6      | (-3 to 17)   | 83.9             |
| South America             | 43        | (38 to 52)  | 43        | (36 to 55) | 44        | (36 to 58) | 46        | (37 to 65) | 48        | (35 to 71) | 5      | (-10 to 27)  | 69.1             |
| North America             | 25        | (24 to 25)  | 22        | (21 to 22) | 20        | (20 to 21) | 19        | (18 to 20) | 17        | (16 to 18) | -7     | (-9 to -6)   | 100              |
| Europe                    | 52        | (48 to 64)  | 45        | (42 to 56) | 38        | (35 to 48) | 34        | (31 to 42) | 29        | (27 to 37) | -23    | (-30 to -18) | 100              |
| Eastern Europe            | 88        | (80 to 107) | 75        | (69 to 93) | 61        | (55 to 75) | 51        | (47 to 62) | 42        | (37 to 51) | -47    | (-60 to -38) | 100              |
| Northern Europe           | 22        | (20 to 25)  | 20        | (19 to 24) | 19        | (18 to 22) | 19        | (18 to 21) | 18        | (17 to 20) | -4     | (-6 to -3)   | 99.9             |
| Southern Europe           | 37        | (26 to 76)  | 33        | (24 to 67) | 29        | (21 to 58) | 26        | (19 to 55) | 26        | (18 to 55) | -11    | (-32 to -1)  | 95.6             |
| Western Europe            | 14        | (11 to 26)  | 14        | (11 to 25) | 15        | (12 to 27) | 16        | (12 to 28) | 16        | (12 to 28) | 2      | (-3 to 6)    | 77.8             |
| Oceania                   | 20        | (18 to 27)  | 21        | (19 to 29) | 21        | (18 to 30) | 20        | (17 to 29) | 19        | (15 to 28) | -1     | (-4 to 3)    | 72.3             |

\* Posterior probability of a change in the estimated direction  
 Note: Estimates of abortion incidence have been updated since publication in Sedgh et al.
